# Supplementary material for: Oral bisphosphonates are associated with increased risk of subtrochanteric and diaphyseal fractures in elderly women: a nested case–control study
Source: PubMed Central journal article supplement — BMJ Open. 2013 Jan 30;3(1):e002091. doi: 10.1136/bmjopen-2012-002091 (PMC3563115; doi:10.1136/bmjopen-2012-002091), 2013-01-30
Supplement: bmjopen-2012-002091.draft_revisions.pdf [file bmjopen-2012-002091.draft_revisions.pdf]

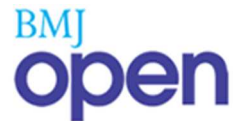

**ORAL BISPHOSPHONATES ARE ASSOCIATED WITH  
INCREASED RISK OF ATYPICAL FEMORAL FRACTURES IN  
ELDERLY WOMEN**

|                                 |                                                                                                                                                                                                                                                                                                                                                                                                                                                                                                                                                                                                                                                                                                                                                           |
|---------------------------------|-----------------------------------------------------------------------------------------------------------------------------------------------------------------------------------------------------------------------------------------------------------------------------------------------------------------------------------------------------------------------------------------------------------------------------------------------------------------------------------------------------------------------------------------------------------------------------------------------------------------------------------------------------------------------------------------------------------------------------------------------------------|
| Journal:                        | <i>BMJ Open</i>                                                                                                                                                                                                                                                                                                                                                                                                                                                                                                                                                                                                                                                                                                                                           |
| Manuscript ID:                  | bmjopen-2012-002091                                                                                                                                                                                                                                                                                                                                                                                                                                                                                                                                                                                                                                                                                                                                       |
| Article Type:                   | Research                                                                                                                                                                                                                                                                                                                                                                                                                                                                                                                                                                                                                                                                                                                                                  |
| Date Submitted by the Author:   | 10-Sep-2012                                                                                                                                                                                                                                                                                                                                                                                                                                                                                                                                                                                                                                                                                                                                               |
| Complete List of Authors:       | <p>Erviti, Juan; Navarre Health Service, Drug Information Unit<br/> Alonso, Alvaro; University of Minnesota, School of Public Health<br/> Oliva, Belén; Spanish Agency for Medicines and Medical Devices, BIFAP Research Unit<br/> Gorricho, Javier; Navarre Health Service, Drug Information Unit<br/> López, Antonio; Navarre Health Service, Drug Information Unit<br/> Timoner, Julia; Spanish Agency for Medicines and Medical Devices, BIFAP Research Unit<br/> Huerta, Consuelo; Spanish Agency for Medicines and Medical Devices, BIFAP Research Unit<br/> Gil, Miguel; Spanish Agency for Medicines and Medical Devices, BIFAP Research Unit<br/> De Abajo, Francisco; Spanish Agency for Medicines and Medical Devices, BIFAP Research Unit</p> |
| <b>Primary Subject Heading</b>: | Pharmacology and therapeutics                                                                                                                                                                                                                                                                                                                                                                                                                                                                                                                                                                                                                                                                                                                             |
| Secondary Subject Heading:      | Epidemiology                                                                                                                                                                                                                                                                                                                                                                                                                                                                                                                                                                                                                                                                                                                                              |
| Keywords:                       | CLINICAL PHARMACOLOGY, EPIDEMIOLOGY, PRIMARY CARE                                                                                                                                                                                                                                                                                                                                                                                                                                                                                                                                                                                                                                                                                                         |
|                                 |                                                                                                                                                                                                                                                                                                                                                                                                                                                                                                                                                                                                                                                                                                                                                           |

SCHOLARONE™  
Manuscripts

**TITLE****ORAL BISPHOSPHONATES ARE ASSOCIATED WITH INCREASED RISK OF ATYPICAL FEMORAL FRACTURES IN ELDERLY WOMEN**

Juan Erviti<sup>1</sup>, Álvaro Alonso<sup>2,3</sup>, Belén Oliva<sup>4</sup>, Javier Gorricho<sup>1</sup>, Antonio López<sup>1</sup>, Julia Timoner<sup>4</sup>, Consuelo Huerta<sup>4</sup>, Miguel Gil<sup>4</sup> and Francisco De Abajo<sup>4,5</sup>.

<sup>1</sup>Drug Prescribing Unit, Navarre Health Service, Pamplona, Navarre, Spain; <sup>2</sup>School of Public Health, University of Minnesota, Minneapolis, Minnesota, United States; <sup>3</sup>School of Medicine, University of Navarre, Pamplona, Navarre, Spain; <sup>4</sup>BIFAP Research Unit, Division of Pharmacoepidemiology and Pharmacovigilance, Spanish Agency for Medicines and Medical Devices, Madrid, Spain; and <sup>5</sup>Clinical Pharmacology Unit, University Hospital "Príncipe de Asturias", Department of Pharmacology, University of Alcalá, Madrid, Spain.

**ARTICLE SUMMARY****Article Focus**

. The hypothesis of this study is that oral bisphosphonates may increase atypical femoral fracture risk in elderly women in the long-term use.

**Key messages**

. Bisphosphonate use was associated with an increased risk of atypical femoral fractures in elderly women

. A higher risk among long-term bisphosphonate users was observed.

**Strengths and limitations**

. The main strength is that the observed odds ratios indicate a strong association between bisphosphonate use and increased atypical femoral fracture risk that can hardly be challenged on grounds of bias in the design.

. One of the main limitations of this study is the small number of cases, which made it unfeasible to perform subgroup or individual drugs analyses. X-ray images were not available. However this may not be a relevant limitation yet hip fracture cases are described in detail in the surgical procedures.

**ABSTRACT****Objectives:**

To evaluate the association between bisphosphonate use and risk of atypical femoral fractures among women aged 65 or older.

**Design:**

Nested case-control study

**Setting:**

General practice research database in Spain.

**Participants:**

Cases were defined as women aged 65 years or older with a first diagnosis of atypical femoral fracture (subtrochanteric or diaphyseal). For each case, 5 age- and calendar year-matched controls without history of hip or atypical fracture were randomly selected.

**Interventions:**

Information on bisphosphonate use, atypical femoral fractures, comedication, and comorbidities was collected.

**Primary outcomes**

Atypical femoral fracture risk comparing bisphosphonate users vs never users

**Secondary outcomes**

Atypical femoral fracture risk comparing bisphosphonate users vs never users by individual drugs

**Results:**

The analysis included 44 cases and 220 matched controls (mean age, 82 years). Ever use of bisphosphonates was more frequent in cases than controls (29.6% vs 10.5%). In multivariate analyses, OR (95%CI) of atypical femoral fracture was 4.30 (1.55-11.9) in ever vs never users of bisphosphonates. A duration-dependent association was suggested, with higher risk among those with longer exposure to bisphosphonates regardless the criteria used, either cumulative duration (>3 years, OR=31.9; 95%CI, 4.05-251) or time since first prescription (>3 years, OR=9.46; 95%CI, 2.17-41.3),  $p$  for trend=0.01.

**Conclusions:**

Bisphosphonate use was associated with an increased risk of atypical femoral fractures in elderly women, with a higher risk among long-term bisphosphonate users.

**Trial Registration**

Spanish Ministry of Health. TRA-071

**INTRODUCTION****Background**

In 2005, *Odvin* et al published the first paper warning about the potentially harmful effects of alendronate due to suppression of bone remodelling.<sup>1</sup> Spontaneous fractures were observed in 9 patients receiving long-term treatment with the drug (between 3-8 years). It was hypothesized that bisphosphonate long-term use might increase the risk of fracture and cause difficulties in repairing fractures in some patients.

Then more cases and short series of cases were described.<sup>2-11</sup> During 2009 a case-control study was carried out to evaluate the association between low impact femur fractures and the long-term use of bisphosphonates.<sup>12</sup> A comparison was made between 41 subtrochanteric or diaphyseal fractures with 82 control patients with femoral or inter-trochanteric fractures. A strong association was found between the use of bisphosphonates and atypical fractures. At the same time, a typical radiological pattern was described for the fractures related to bisphosphonates. During the same year more cases and series of cases of femur fractures associated with the use of bisphosphonates were published.<sup>13-16</sup> The capacity of

1  
2  
3 bisphosphonates to weaken bone structure is reflected in an article that describes a  
4 series of seven cases of bilateral fractures or sequential cases of low impact  
5 fractures all associated with the treatment with alendronate for at least five years.<sup>17</sup>  
6 These included one patient with simultaneous bilateral femur fractures affecting the  
7 diaphysis, two patients with sequential subtrochanteric fractures and four patients  
8 in whom a contralateral subtrochanteric fracture was discovered after diagnosing  
9 the initial fracture.

10  
11 Finally, in two cohort analyses bisphosphonate use was associated with a much  
12 higher relative risk of atypical fractures<sup>18,19</sup> (17 and 47-fold higher, respectively)  
13 while a recent case-control study showed a 3-fold increase in bisphosphonate  
14 users.<sup>20</sup> More studies in different populations with sufficient sample size are needed  
15 in order to shed more light on the use of bisphosphonates and atypical fracture  
16 risk.

## 17 18 19 **Objective**

20  
21 The aim of this study is to evaluate the association between use of bisphosphonates  
22 and risk of atypical femoral fractures among women aged 65 years or older in a  
23 Mediterranean population. We hypothesized that oral bisphosphonates could  
24 increase atypical fracture risk.  
25

## 26 27 28 **METHODS**

### 29 30 **Study design and setting**

31 We carried out a case-control study nested in the Spanish database BIFAP (*Base de*  
32 *Datos para la Investigación Farmacoepidemiológica en Atención Primaria*, Database  
33 for Pharmacoepidemiologic Research in Primary Care). This is a longitudinal  
34 population-based database maintained by the Spanish Agency for Medicines and  
35 Medical Devices that collects, from 2001 onwards, the computerized medical  
36 records of >3.2 million patients attended by more than 1,800 primary care  
37 physicians throughout Spain. It includes anonymized information on >13.7 million  
38 person-years of follow up.<sup>21,22</sup> This project was approved by the Navarre Research  
39 Ethics Board, Pamplona, Spain. All data were anonymized and no written consent  
40 was necessary for this type of study according to the Spanish regulations (law  
41 41/2002, article 16).  
42  
43  
44  
45  
46  
47

### 48 49 **Participants**

50 Cases were defined as women aged 65 years or older with a first diagnosis of  
51 atypical femoral fracture (subtrochanteric or diaphyseal), recorded between  
52 01/01/2005 and 31/12/2008, and with at least 1 year of follow-up in BIFAP before  
53 the event date. Pre-selected cases for hip fracture were identified by both ICPC-1  
54 codes and free text searching. All clinical records of the potential cases were  
55 manually reviewed by the BIFAP team blinded to the exposure status. The date of  
56 hospitalization served as the index date. We studied in detail the description of the  
57 atypical fractures in the clinical records and made sure about the location  
58 (subtrochanteric region and femoral shaft). We excluded women with any history of  
59  
60

1  
2  
3 cancer, Paget disease, prevalent hip fracture and fractures resulting from trauma or  
4 motor vehicle collisions. All cases were double-checked by the Spanish Medicines  
5 Agency experts. For each case, 5 age- and calendar year-matched controls without  
6 history of hip or atypical fracture were randomly selected from the database.  
7

### 8 9 **Medication use and other covariates**

10  
11 Use of bisphosphonates before the index date was obtained from the computerized  
12 database. Duration of bisphosphonate exposure was evaluated by examining  
13 prescriptions for oral alendronate, risedronate, ibandronate or etidronate from the  
14 beginning of therapy to the index date or the corresponding date among controls  
15 (ATC codes: alendronate, M05BA04; alendronate plus vitamin D, M05BB;  
16 risedronate, M05BA07 and ibandronate, M05BA06).  
17

18 Individuals were classified as ever vs never users. Ever users were also divided into  
19 *current users* (if most recent prescription lasted through index date or ended in the  
20 month before it), *recent users* (if most recent prescription ended between 1 and 6  
21 months before index date) and *past users* (if most recent prescription ended more  
22 than 6 months before index date).  
23

24 In order to assess the effects of treatment length on the outcomes two criteria were  
25 used: a) Cumulative duration of actual treatment; and b) Time since first  
26 prescription. In both, three different subgroups were considered, namely <1 year;  
27 1 to 3 years and over 3 years.  
28

29 Information on comorbidities (ICPC-1 codes) and use of other medications (ATC  
30 codes) was obtained. Patients were considered exposed if the most recent  
31 prescription lasted through index date or ended in the month before it. Other  
32 variables such as weight (kg), height (cm), body mass index (kg/m<sup>2</sup>) and smoking  
33 status (yes/no/past smoker) were obtained as well.  
34

### 35 36 **Statistical methods**

37 We used conditional logistic regression to estimate the odds ratios (ORs) and 95  
38 percent confidence intervals (CIs) for the association between bisphosphonate  
39 exposure (ever vs. never) and hip fractures. Treatment duration was assessed as  
40 well and results were tested to identify a trend. The level of significance was  
41 established at p = 0.05.  
42

43 An initial model adjusted only for matching variables. A second model adjusted  
44 additionally for smoking, BMI, alcoholism, previous fracture, kidney disease,  
45 malabsorption, stroke, dementia, rheumatoid arthritis, diabetes, epilepsy,  
46 Parkinson disease, thyroid disease, and use of PPI (no use, <=1 yr, >1 yr),  
47 anxiolytics, sedatives, antidepressants, antihypertensives, corticosteroids (no use,  
48 <=1 yr, >1 yr), raloxifene, hormone replacement therapy, and thiazolidinediones.  
49  
50  
51  
52

## 53 54 **RESULTS**

55  
56  
57 Between 2005 and 2008, 45 atypical fractures (31 subtrochanteric and 14 shaft  
58 fractures) were observed. One case was lost to follow-up due to lack of matching  
59  
60

controls. The average age of cases was  $82.2 \pm 6.7$  years. Previous fractures and drug use was more prevalent in cases than in controls (table 1).

Ever use of bisphosphonates was more frequent in cases than in controls, 13 (29.6%) vs 23 (10.5%) yielding to an adjusted OR = 4.30 (95%CI, 1.55-11.9). Within ever users no apparent difference was observed between current, recent or past users, although numbers were quite small. A duration-dependent association was suggested, with higher risk among those with longer exposure to bisphosphonates regardless the criteria used, either cumulative duration (>3 years, OR=31.9; 95%CI, 4.05-251) or time since first prescription (>3 years, OR=9.46; 95%CI, 2.17-41.3) (table 2). The results by individual drugs are not shown because of insufficient sample size.

## DISCUSSION

### Key results

Our findings show an increase of atypical fracture risk among *ever users* of bisphosphonates vs *never users*, and a distinct duration-response association, with higher risk among women using bisphosphonates for longer time period. Results did not vary for bisphosphonate use timing (current use, recent use, past use). Since these drugs accumulate in the bone and remain there for years this grading system may not make any relevant difference, being more important the overall cumulative exposure expressed as time in days since the first prescription. Both unadjusted and adjusted data show a duration-dependent association between bisphosphonate use and higher risk of atypical fractures regardless the criteria used, either cumulative duration or time since first prescription.

Both cohort and case-control studies show an increased risk of atypical fractures associated with bisphosphonate use. Our results are similar to those obtained in the largest case-control study published so far<sup>20</sup> and show an overall 4-fold higher risk. In this study an association between long-term use and higher risk was also observed. In two cohort studies overall fracture risk observed was much higher.<sup>18,19</sup>

Bisphosphonates induce apoptosis of the osteoclasts and inhibit bone resorption. However, during the normal process of bone remodeling the formation of bone produced by osteoblasts is induced by osteoclasts, which implies that on reducing the resorptive activity, there is also an accompanying reduction in bone formation. The greater bone density observed after treatment with bisphosphonates may thus reflect bone weakness and not strength given the increase of mineral content in the bone. Bisphosphonates also weaken the collagen structure and produce an accumulation of microscopic injuries in bone structure. Biologically, this makes it plausible that long-term bisphosphonate use would increase the risk of fracture and cause difficulty in repairing fractures.

Deleterious effects on bone structure have been observed with both bisphosphonates and denosumab but not with other drugs used for osteoporosis. Both type of drugs inhibit the activity of osteoclasts and thereby bone resorption. Since osteoblastic bone formation follows osteoclastic resorption during normal bone remodelling, the inhibition of resorption is accompanied by a decrease in bone formation. In other words, bone strength may be weaker as normal turnover is

1  
2  
3 inhibited. Furthermore bisphosphonates prolong secondary mineralization leading to  
4 increased BMD but decreased bone strength due to a higher mineral content (brittle  
5 bones).

6  
7 A typical radiological pattern was described for the fractures related to  
8 bisphosphonates and a high association between the use of bisphosphonates and  
9 the appearance of this radiological pattern.<sup>23</sup> Also Koh et al determined that  
10 atypical lesions are more frequent in femur regions of maximal tension loading.<sup>24</sup>  
11 Thereby there is biological, radiological and mechanical rationale for an increase in  
12 atypical fracture risk associated with the use of bisphosphonates.

### 13 14 15 **Limitations**

16  
17 One of the main limitations of this study is the small number of cases, which made  
18 it unfeasible to perform subgroup or individual drugs analyses. Also we relied on  
19 prescription data to determine exposure status and duration of bisphosphonate  
20 exposure. It is sensible to think that real exposure will likely be lower than  
21 registered to some extent. However, this will most probably represent a non-  
22 differential misclassification that would distort the result towards the null value.  
23 Therefore, given that our findings show an increase in atypical fracture risk  
24 associated with bisphosphonate use we may assume that it represents a  
25 conservative estimate. In the clinical records included in the BIFAP database X-ray  
26 images are not available which might occasionally lead to misclassification of cases.  
27 However we believe this may not be a relevant limitation yet hip fracture cases are  
28 described in detail in the surgical procedures.

29  
30 Bone mineral density determination is not a standard test available in the public  
31 health system in Spain. Thereby information on bone density in clinical records was  
32 rather scarce. In any case, this test has a very poor fracture risk predictive value  
33 and its clinical relevance can be challenged. In the present analysis, we adjusted for  
34 other bone-related variables. One of these prevalence of previous fractures might  
35 confound the association between bisphosphonate use and risk of fracture. In order  
36 to minimize confounding by indication bias, results were adjusted for previous  
37 fractures, comorbidities and use of other medications.

### 38 39 40 **CONCLUSION**

41  
42 Bisphosphonate use was associated with an increased risk of atypical femoral  
43 fractures in elderly women in a Mediterranean population, with a higher risk among  
44 long-term bisphosphonate users.

### 45 46 47 **Acknowledgements**

48  
49 The authors would like to thank the collaboration of general practitioners  
50 contributing to BIFAP.

### 51 52 53 **Disclaimer:**

54  
55 The views expressed are those of the authors only and do not represent necessarily  
56 the position of their respective institutions.



## Footnotes

- Contributors JE, AA, JG, AL, JT, MG, and FD were responsible for developing of study concept and design, and interpretation of the results. JE, AA, JG, AL, JT, and MG carried out the data validation. AA performed the statistical analyses. BO and CH were responsible for data extraction. JE drafted the manuscript. All authors have been involved in revising and elaborating it critically in the intellectual context.
- Funding: The present study is funded by the Spanish Ministry of Health, grant SAS/2481/2009 No TRA-071
- Competing interests: None.
- Ethics approval: Navarre Research Ethics Board, Pamplona, Spain.
- Data sharing statement: There are no additional data sharing to other parties.

## References

- <sup>1</sup> Odvina CV, Zerwekh JE, Rao DS, et al. Severely suppressed bone turnover: a potential complication of alendronate therapy. *J Clin Endocrinol Metab* 2005;90:1294-1301.
- <sup>2</sup> Schneider JP. Should bisphosphonates be continued indefinitely? An unusual fracture in a healthy woman on long-term alendronate. *Geriatrics* 2006; 61(1)31-33.
- <sup>3</sup> Cheung R, Leung KK, Lee KC et al. Sequential non-traumatic femoral shaft fractures in a patient on long-term alendronate. *Hong Kong Med J* 2007;13(6):485-9.
- <sup>4</sup> Lee P, van der Wall H, and Seibel MJ. Looking beyond low bone mineral density: multiple insufficiency fractures in a woman with post-menopausal osteoporosis on alendronate therapy. *J Endocrinol Invest* 2007;30:590-97.
- <sup>5</sup> Goh SK, Yang KY, Koh JSB, et al. Subtrochanteric insufficiency fractures in patients on alendronate therapy. A caution. *J Bone Joint Surg (Br)* 2007;89-B:349-53.
- <sup>6</sup> Sayed-Noor AS and Sjöden GO. Suctrochanteric displaced insufficiency fracture after long-term alendronate therapy – a case report. *Acta Orthopædica* 2008;79(4):565-567
- <sup>7</sup> Visekruna M, Wilson D, and McKiernan FE. Severely suppressed bone turnover and atypical skeletal fragility. *J Clin Endocrinol Metabol* 2008;93(8):2948-2952.
- <sup>8</sup> Kwek EBK, Koh JSB and Howe TS. More on atypical fractures of the femoral diaphysis (letter). *N Engl J Med* 2008;359(3):316-318.
- <sup>9</sup> Lenart BA, Lorich DG, and Lane JM. Atypical fractures of the femoral diaphysis in postmenopausal women taking alendronate (letter). *N Engl J Med* 2008;358(12):1304-1306.
- <sup>10</sup> Kwek EBK, Goh SK, Koh JSB, et al. An emerging pattern of subtrochanteric stress fractures: a long-term complication of alendronate therapy? *Injury* 2008;39:224-31.
- <sup>11</sup> Neviasser AS, Lane JM, Lenart BA, et al. Low-energy femoral shaft fractures associated with alendronate use. *J Orthop Trauma* 2008;22(5):346-350.
- <sup>12</sup> Lenart BA, Neviasser AS, Lyman S, et al. Association of low-energy femoral fractures with prolonged bisphosphonate use: a case control study. *Osteoporos Int* 2009;20:1353-1362.
- <sup>13</sup> Sabed-Noor AS, and Sjöden GO. Two femoral insufficiency fractures after long-term alendronate therapy. *Clin Orthop Relat Res* 2009;467:1921-6.
- <sup>14</sup> Ing-Lorenzini K, Desmeules J, Plachta O, et al. Low-energy femoral fractures associated with the long-term use of bisphosphonates. A case series from a Swiss University Hospital. *Drug Safety* 2009;32(9):775-785.
- <sup>15</sup> Goddard MS, Kristoff RR, Johnston JC, et al. A traumatic bilateral femur fracture in long-term bisphosphonate use. *Orthopedics* 2009;32:607.
- <sup>16</sup> Odvina CV, Levy S, Rao S, et al. Unusual mid-shaft fractures during long term bisphosphonate therapy. *Clin Endocrinol (Oxf)*, doi: 10.1111/j.1365-2265.2009.03581.x
- <sup>17</sup> Capeci CM and Tejwani NC. Bilateral low-energy simultaneous or sequential femoral fractures in patients on long-term alendronate therapy. *J Bone Joint Surg Am* 2009;91:2556-61
- <sup>18</sup> Giusti A, Hamdy NA, Dekkers OM, et al. Atypical fractures and bisphosphonate therapy: a cohort study of patients with femoral fracture with radiographic adjudication of fracture site and features. *Bone*. 2011;48(5):966-71.



1  
2  
3<sup>19</sup> Schilcher J, Michaëlsson K, and Aspenberg P. Bisphosphonate use and atypical fractures of the femoral shaft. *N Engl J Med*. 2011;364(18):1728-37.

4  
5<sup>20</sup> Park-Wyllie LY, Mamdani MM, Juurlink DN, et al. Bisphosphonate use and the risk of subtrochanteric or femoral shaft fractures in older women. *JAMA* 2011;305(8):783-9.

6  
7<sup>21</sup> Salvador JC, Moreno D, Sonogo LA, et al. El Proyecto BIFAP: Base de datos para la Investigación. *Aten Primaria* 2002; 30: 655-661.

8  
9<sup>22</sup> Agencia Española de Medicamentos y Productos Sanitarios. Proyecto BIFAP <http://www.bifap.org/summary.php>

10  
11<sup>23</sup> Lenart BA, Neviasser AS, Lyman S, et al. Association of low-energy femoral fractures with prolonged bisphosphonate use: a case control study. *Osteoporos Int* 2009; 20:1353-1362.

12  
13<sup>24</sup> Koh JSB, Goh SK, Png MA, et al. Distribution of atypical fractures and cortical stress lesions in the femur: implications on pathophysiology. *Singapore Med J* 2011;52(2):77-80

14  
15  
16  
17  
18  
19  
20  
21  
22  
23  
24  
25  
26  
27  
28  
29  
30  
31  
32  
33  
34  
35  
36  
37  
38  
39  
40  
41  
42  
43  
44  
45  
46  
47  
48  
49  
50  
51  
52  
53  
54  
55  
56  
57  
58  
59  
60

For peer review only

**Table 1. Characteristics of cases and controls**

|                                                | <b>Cases</b> | <b>Controls</b> |
|------------------------------------------------|--------------|-----------------|
| N                                              | 44           | 220             |
| Age, years ( $\pm$ SD)                         | 82.2 (6.7)   | 82.2 (6.6)      |
| Smoking                                        |              |                 |
| Non-current smoker, %                          | 77.3         | 70.9            |
| Current smoker, %                              | 2.3          | 3.2             |
| Not recorded, %                                | 20.5         | 25.9            |
| Alcoholism, %                                  | 0.0          | 0.0             |
| Body mass index, kg/m <sup>2</sup> ( $\pm$ SD) | 29.4 (4.9)   | 29.1 (5.3)      |
| <20 kg/m <sup>2</sup> , %                      | 0.0          | 1.4             |
| 20-<25 kg/m <sup>2</sup> , %                   | 9.1          | 14.1            |
| 25-<30 kg/m <sup>2</sup> , %                   | 29.6         | 25.0            |
| $\geq$ 30 kg/m <sup>2</sup> , %                | 31.8         | 32.3            |
| Not recorded, %                                | 29.6         | 27.1            |
|                                                |              |                 |
| <b>Comorbidities</b>                           |              |                 |
| Previous fracture, %                           | 20.5         | 8.2             |
| Kidney disease, %                              | 4.6          | 5.0             |
| Malabsorption, %                               | 2.3          | 1.4             |
| Stroke, %                                      | 9.1          | 6.4             |
| Dementia, %                                    | 9.1          | 8.6             |
| Rheumatoid arthritis, %                        | 2.3          | 1.4             |
| Diabetes, %                                    | 18.2         | 20.5            |
| Epilepsy, %                                    | 2.3          | 0.5             |
| Parkinson disease, %                           | 0.0          | 1.8             |
| Thyroid disease, %                             | 9.1          | 13.2            |
|                                                |              |                 |
| <b>Use of medication</b>                       |              |                 |
| PPI or H2 receptor blocker, %                  | 34.1         | 33.2            |
| Anxiolytic, %                                  | 22.7         | 24.1            |
| Antidepressants, %                             | 9.1          | 19.6            |
| Antihypertensives, %                           | 50.0         | 60.9            |
| Oral corticosteroids, %                        | 4.6          | 7.3             |
| Sedatives, %                                   | 9.1          | 6.8             |
| Raloxifene, %                                  | 0.0          | 2.3             |
| Hormone replacement therapy, %                 | 0.0          | 0.0             |
| Thiazolidinedione, %                           | 0.0          | 0.0             |

Values correspond to percentage or means (standard deviation)

**Table 2. Association of any bisphosphonate use with the risk of atypical femoral fracture**

|                                              | Cases     | Controls   | Average cumulative duration (days) | Time since first bisphosphonate prescription (days) | Model 1          | Model 2          |
|----------------------------------------------|-----------|------------|------------------------------------|-----------------------------------------------------|------------------|------------------|
|                                              | n (%)     | n (%)      | Mean (SD)                          | Mean (SD)                                           | OR (95% CI)      | OR (95% CI)      |
| Use                                          |           |            |                                    |                                                     |                  |                  |
| No use                                       | 31 (70.5) | 197 (89.5) | -                                  | -                                                   | 1 (ref.)         | 1 (ref.)         |
| Ever use                                     | 13 (29.6) | 23 (10.5)  | 658 (538)                          | 1007 (708)                                          | 3.63 (1.64-8.02) | 4.30 (1.55-11.9) |
| Timing                                       |           |            |                                    |                                                     |                  |                  |
| No use                                       | 31 (70.5) | 197 (89.5) | -                                  | -                                                   | 1 (ref.)         | 1 (ref.)         |
| Past use                                     | 3 (6.8)   | 6 (2.7)    | 567 (569)                          | 1655 (772)                                          | 3.16 (0.76-13.0) | 4.43 (0.62-31.9) |
| Recent use                                   | 1 (2.3)   | 2 (0.9)    | 299 (199)                          | 448 (87)                                            | 4.89 (0.27-87.1) | 3.40 (0.03-384)  |
| Current use                                  | 9 (20.5)  | 15 (6.8)   | 737 (546)                          | 835 (566)                                           | 3.76 (1.51-9.36) | 4.29 (1.39-13.3) |
| Duration                                     |           |            |                                    |                                                     |                  |                  |
| No use                                       | 31 (70.5) | 197 (89.6) | -                                  | -                                                   | 1 (ref.)         | 1 (ref.)         |
| ≤1 yr                                        | 4 (9.1)   | 8 (3.6)    | 156 (100)                          | 675 (731)                                           | 3.27 (0.92-11.7) | 2.55 (0.47-13.7) |
| >1 yr - ≤3 yr                                | 4(9.1)    | 12 (5.5)   | 622 (213)                          | 967 (673)                                           | 2.01 (0.58-6.92) | 1.68 (0.36-7.85) |
| >3 yr                                        | 5 (11.4)  | 3 (1.4)    | 1485 (341)                         | 1587 (346)                                          | 9.18 (2.12-38.9) | 31.9 (4.05-251)  |
| P for trend                                  |           |            |                                    |                                                     | 0.002            | 0.0007           |
| Time since first bisphosphonate prescription |           |            |                                    |                                                     |                  |                  |
| No use                                       | 31 (70.5) | 197 (89.6) | -                                  | -                                                   | 1 (ref.)         | 1 (ref.)         |
| <1 yr                                        | 3 (6.8)   | 2 (0.9)    | 142 (120)                          | 150 (130)                                           | 10.0 (1.6-62.0)  | 4.98 (0.56-44.2) |
| 1 - <3yr                                     | 4 (9.1)   | 13 (5.9)   | 446 (230)                          | 659 (180)                                           | 1.94 (0.56-6.76) | 1.72 (0.36-8.34) |
| ≥3 yr                                        | 6 (13.6)  | 8 (3.6)    | 1100 (582)                         | 1737 (540)                                          | 4.71 (1.52-14.6) | 9.46 (2.17-41.3) |
| P for trend**                                |           |            |                                    |                                                     | 0.03             | 0.01             |

Model 1: Conditional logistic regression model adjusted for matching variables

Model 2: Conditional logistic regression model adjusted for matching variables, smoking, alcoholism, BMI, previous fracture, kidney disease, malabsorption, stroke, dementia, rheumatoid arthritis, diabetes, epilepsy, Parkinson disease, thyroid disease, PPI (no use, ≤1 yr, >1 yr), anxiolytics, sedatives, antidepressants, antihypertensives, corticosteroids (no use, ≤1 yr, >1 yr), raloxifene, hormone replacement therapy, and thiazolidinediones.

\* Modeled as the median duration of use in each category; \*\* Modeled as time in days since first bisphosphonate prescription (0 for no users)

**STROBE 2007 (v4) checklist of items to be included in reports of observational studies in epidemiology\***  
**Checklist for cohort, case-control, and cross-sectional studies (combined)**

| Section/Topic             | Item # | Recommendation                                                                                                                                                                                                                                                                                                                                                                                                                                                                   | Reported on page # |
|---------------------------|--------|----------------------------------------------------------------------------------------------------------------------------------------------------------------------------------------------------------------------------------------------------------------------------------------------------------------------------------------------------------------------------------------------------------------------------------------------------------------------------------|--------------------|
| Title and abstract        | 1      | (a) Indicate the study’s design with a commonly used term in the title or the abstract. <b>OK</b>                                                                                                                                                                                                                                                                                                                                                                                |                    |
|                           |        | (b) Provide in the abstract an informative and balanced summary of what was done and what was found <b>OK</b>                                                                                                                                                                                                                                                                                                                                                                    |                    |
| <b>Introduction</b>       |        |                                                                                                                                                                                                                                                                                                                                                                                                                                                                                  |                    |
| Background/rationale      | 2      | Explain the scientific background and rationale for the investigation being reported <b>OK</b>                                                                                                                                                                                                                                                                                                                                                                                   |                    |
| Objectives                | 3      | State specific objectives, including any pre-specified hypotheses <b>OK</b>                                                                                                                                                                                                                                                                                                                                                                                                      |                    |
| <b>Methods</b>            |        |                                                                                                                                                                                                                                                                                                                                                                                                                                                                                  |                    |
| Study design              | 4      | Present key elements of study design early in the paper <b>OK</b>                                                                                                                                                                                                                                                                                                                                                                                                                |                    |
| Setting                   | 5      | Describe the setting, locations, and relevant dates, including periods of recruitment, exposure, follow-up, and data collection <b>OK</b>                                                                                                                                                                                                                                                                                                                                        |                    |
| Participants              | 6      | (a) <i>Cohort study</i> —Give the eligibility criteria, and the sources and methods of selection of participants. Describe methods of follow-up<br><i>Case-control study</i> —Give the eligibility criteria, and the sources and methods of case ascertainment and control selection. Give the rationale for the choice of cases and controls <b>OK</b><br><i>Cross-sectional study</i> —Give the eligibility criteria, and the sources and methods of selection of participants |                    |
|                           |        | (b) <i>Cohort study</i> —For matched studies, give matching criteria and number of exposed and unexposed<br><i>Case-control study</i> —For matched studies, give matching criteria and the number of controls per case <b>OK</b>                                                                                                                                                                                                                                                 |                    |
| Variables                 | 7      | Clearly define all outcomes, exposures, predictors, potential confounders, and effect modifiers. Give diagnostic criteria, if applicable <b>OK</b>                                                                                                                                                                                                                                                                                                                               |                    |
| Data sources/ measurement | 8*     | For each variable of interest, give sources of data and details of methods of assessment (measurement). Describe comparability of assessment methods if there is more than one group <b>OK</b>                                                                                                                                                                                                                                                                                   |                    |
| Bias                      | 9      | Describe any efforts to address potential sources of bias <b>OK</b>                                                                                                                                                                                                                                                                                                                                                                                                              |                    |
| Study size                | 10     | Explain how the study size was arrived at <b>OK</b>                                                                                                                                                                                                                                                                                                                                                                                                                              |                    |
| Quantitative variables    | 11     | Explain how quantitative variables were handled in the analyses. If applicable, describe which groupings were chosen and why <b>OK</b>                                                                                                                                                                                                                                                                                                                                           |                    |
| Statistical methods       | 12     | (a) Describe all statistical methods, including those used to control for confounding <b>OK</b>                                                                                                                                                                                                                                                                                                                                                                                  |                    |
|                           |        | (b) Describe any methods used to examine subgroups and interactions <b>OK</b>                                                                                                                                                                                                                                                                                                                                                                                                    |                    |
|                           |        | (c) Explain how missing data were addressed <b>OK</b>                                                                                                                                                                                                                                                                                                                                                                                                                            |                    |
|                           |        | (d) <i>Cohort study</i> —If applicable, explain how loss to follow-up was addressed<br><i>Case-control study</i> —If applicable, explain how matching of cases and controls was addressed <b>OK</b>                                                                                                                                                                                                                                                                              |                    |

|                          |     |                                                                                                                                                                                                                        |  |
|--------------------------|-----|------------------------------------------------------------------------------------------------------------------------------------------------------------------------------------------------------------------------|--|
|                          |     | <i>Cross-sectional study</i> —If applicable, describe analytical methods taking account of sampling strategy                                                                                                           |  |
|                          |     | (e) Describe any sensitivity analyses                                                                                                                                                                                  |  |
| <b>Results</b>           |     |                                                                                                                                                                                                                        |  |
| Participants             | 13* | (a) Report numbers of individuals at each stage of study—eg numbers potentially eligible, examined for eligibility, confirmed eligible, included in the study, completing follow-up, and analysed <b>OK</b>            |  |
|                          |     | (b) Give reasons for non-participation at each stage <b>Not applicable</b>                                                                                                                                             |  |
|                          |     | (c) Consider use of a flow diagram <b>Not applicable</b>                                                                                                                                                               |  |
| Descriptive data         | 14* | (a) Give characteristics of study participants (eg demographic, clinical, social) and information on exposures and potential confounders <b>OK</b>                                                                     |  |
|                          |     | (b) Indicate number of participants with missing data for each variable of interest <b>OK</b>                                                                                                                          |  |
|                          |     | (c) <i>Cohort study</i> —Summarise follow-up time (eg, average and total amount)                                                                                                                                       |  |
| Outcome data             | 15* | <i>Cohort study</i> —Report numbers of outcome events or summary measures over time                                                                                                                                    |  |
|                          |     | <i>Case-control study</i> —Report numbers in each exposure category, or summary measures of exposure <b>OK</b>                                                                                                         |  |
|                          |     | <i>Cross-sectional study</i> —Report numbers of outcome events or summary measures                                                                                                                                     |  |
| Main results             | 16  | (a) Give unadjusted estimates and, if applicable, confounder-adjusted estimates and their precision (eg, 95% confidence interval). Make clear which confounders were adjusted for and why they were included <b>OK</b> |  |
|                          |     | (b) Report category boundaries when continuous variables were categorized <b>OK</b>                                                                                                                                    |  |
|                          |     | (c) If relevant, consider translating estimates of relative risk into absolute risk for a meaningful time period                                                                                                       |  |
| Other analyses           | 17  | Report other analyses done—eg analyses of subgroups and interactions, and sensitivity analyses <b>OK</b>                                                                                                               |  |
| <b>Discussion</b>        |     |                                                                                                                                                                                                                        |  |
| Key results              | 18  | Summarise key results with reference to study objectives <b>OK</b>                                                                                                                                                     |  |
| Limitations              | 19  | Discuss limitations of the study, taking into account sources of potential bias or imprecision. Discuss both direction and magnitude of any potential bias <b>OK</b>                                                   |  |
| Interpretation           | 20  | Give a cautious overall interpretation of results considering objectives, limitations, multiplicity of analyses, results from similar studies, and other relevant evidence <b>OK</b>                                   |  |
| Generalisability         | 21  | Discuss the generalisability (external validity) of the study results <b>OK</b>                                                                                                                                        |  |
| <b>Other information</b> |     |                                                                                                                                                                                                                        |  |
| Funding                  | 22  | Give the source of funding and the role of the funders for the present study and, if applicable, for the original study on which the present article is based <b>OK</b>                                                |  |

\*Give information separately for cases and controls in case-control studies and, if applicable, for exposed and unexposed groups in cohort and cross-sectional studies.

**Note:** An Explanation and Elaboration article discusses each checklist item and gives methodological background and published examples of transparent reporting. The STROBE checklist is best used in conjunction with this article (freely available on the Web sites of PLoS Medicine at <http://www.plosmedicine.org/>, Annals of Internal Medicine at <http://www.annals.org/>, and Epidemiology at <http://www.epidem.com/>). Information on the STROBE Initiative is available at [www.strobe-statement.org](http://www.strobe-statement.org).



**ORAL BISPHOSPHONATES ARE ASSOCIATED WITH  
INCREASED RISK OF ATYPICAL FEMORAL FRACTURES IN  
ELDERLY WOMEN**

|                                 |                                                                                                                                                                                                                                                                                                                                                                                                                                                                                                                                                                                                                                                                                                                                    |
|---------------------------------|------------------------------------------------------------------------------------------------------------------------------------------------------------------------------------------------------------------------------------------------------------------------------------------------------------------------------------------------------------------------------------------------------------------------------------------------------------------------------------------------------------------------------------------------------------------------------------------------------------------------------------------------------------------------------------------------------------------------------------|
| Journal:                        | <i>BMJ Open</i>                                                                                                                                                                                                                                                                                                                                                                                                                                                                                                                                                                                                                                                                                                                    |
| Manuscript ID:                  | bmjopen-2012-002091.R1                                                                                                                                                                                                                                                                                                                                                                                                                                                                                                                                                                                                                                                                                                             |
| Article Type:                   | Research                                                                                                                                                                                                                                                                                                                                                                                                                                                                                                                                                                                                                                                                                                                           |
| Date Submitted by the Author:   | 18-Dec-2012                                                                                                                                                                                                                                                                                                                                                                                                                                                                                                                                                                                                                                                                                                                        |
| Complete List of Authors:       | Erviti, Juan; Navarre Health Service, Drug Information Unit<br>Alonso, Alvaro; University of Minnesota, School of Public Health<br>Oliva, Belén; Spanish Agency for Medicines and Medical Devices, BIFAP Research Unit<br>Gorricho, Javier; Navarre Health Service, Drug Information Unit<br>López, Antonio; Navarre Health Service, Drug Information Unit<br>Timoner, Julia; Spanish Agency for Medicines and Medical Devices, BIFAP Research Unit<br>Huerta, Consuelo; Spanish Agency for Medicines and Medical Devices, BIFAP Research Unit<br>Gil, Miguel; Spanish Agency for Medicines and Medical Devices, BIFAP Research Unit<br>De Abajo, Francisco; Spanish Agency for Medicines and Medical Devices, BIFAP Research Unit |
| <b>Primary Subject Heading</b>: | Pharmacology and therapeutics                                                                                                                                                                                                                                                                                                                                                                                                                                                                                                                                                                                                                                                                                                      |
| Secondary Subject Heading:      | Epidemiology                                                                                                                                                                                                                                                                                                                                                                                                                                                                                                                                                                                                                                                                                                                       |
| Keywords:                       | CLINICAL PHARMACOLOGY, EPIDEMIOLOGY, PRIMARY CARE                                                                                                                                                                                                                                                                                                                                                                                                                                                                                                                                                                                                                                                                                  |
|                                 |                                                                                                                                                                                                                                                                                                                                                                                                                                                                                                                                                                                                                                                                                                                                    |

SCHOLARONE™  
Manuscripts

**Table 1. Characteristics of cases and controls**

|                                                | <b>Cases</b> | <b>Controls</b> |
|------------------------------------------------|--------------|-----------------|
| N                                              | 44           | 220             |
| Age, years ( $\pm$ SD)                         | 82.2 (6.7)   | 82.2 (6.6)      |
| Smoking                                        |              |                 |
| Non-current smoker, %                          | 77.3         | 70.9            |
| Current smoker, %                              | 2.3          | 3.2             |
| Not recorded, %                                | 20.5         | 25.9            |
| Alcoholism, %                                  | 0.0          | 0.0             |
| Body mass index, kg/m <sup>2</sup> ( $\pm$ SD) | 29.4 (4.9)   | 29.1 (5.3)      |
| <20 kg/m <sup>2</sup> , %                      | 0.0          | 1.4             |
| 20-<25 kg/m <sup>2</sup> , %                   | 9.1          | 14.1            |
| 25-<30 kg/m <sup>2</sup> , %                   | 29.6         | 25.0            |
| $\geq$ 30 kg/m <sup>2</sup> , %                | 31.8         | 32.3            |
| Not recorded, %                                | 29.6         | 27.1            |
|                                                |              |                 |
| <b>Comorbidities</b>                           |              |                 |
| Previous fracture, %                           | 20.5         | 8.2             |
| Kidney disease, %                              | 4.6          | 5.0             |
| Malabsorption, %                               | 2.3          | 1.4             |
| Stroke, %                                      | 9.1          | 6.4             |
| Dementia, %                                    | 9.1          | 8.6             |
| Rheumatoid arthritis, %                        | 2.3          | 1.4             |
| Diabetes, %                                    | 18.2         | 20.5            |
| Epilepsy, %                                    | 2.3          | 0.5             |
| Parkinson disease, %                           | 0.0          | 1.8             |
| Thyroid disease, %                             | 9.1          | 13.2            |
|                                                |              |                 |
| <b>Use of medication</b>                       |              |                 |
| PPI or H2 receptor blocker, %                  | 34.1         | 33.2            |
| Anxiolytic, %                                  | 22.7         | 24.1            |
| Antidepressants, %                             | 9.1          | 19.6            |
| Antihypertensives, %                           | 50.0         | 60.9            |
| Oral corticosteroids, %                        | 4.6          | 7.3             |
| Sedatives, %                                   | 9.1          | 6.8             |
| Raloxifene, %                                  | 0.0          | 2.3             |
| Hormone replacement therapy, %                 | 0.0          | 0.0             |
| Thiazolidinedione, %                           | 0.0          | 0.0             |

Values correspond to percentage or means (standard deviation)



**Table 2. Association of any bisphosphonate use with the risk of atypical femoral fracture**

|                                                     | Cases     | Controls   | Average cumulative duration (days) | Time since first bisphosphonate prescription (days) | Model 1          | Model 2          |
|-----------------------------------------------------|-----------|------------|------------------------------------|-----------------------------------------------------|------------------|------------------|
|                                                     | n (%)     | n (%)      | Mean (SD)                          | Mean (SD)                                           | OR (95% CI)      | OR (95% CI)      |
| <b>Use</b>                                          |           |            |                                    |                                                     |                  |                  |
| No use                                              | 31 (70.5) | 197 (89.5) | -                                  | -                                                   | 1 (ref.)         | 1 (ref.)         |
| Ever use                                            | 13 (29.6) | 23 (10.5)  | 658 (538)                          | 1007 (708)                                          | 3.63 (1.64-8.02) | 4.30 (1.55-11.9) |
| <b>Timing</b>                                       |           |            |                                    |                                                     |                  |                  |
| No use                                              | 31 (70.5) | 197 (89.5) | -                                  | -                                                   | 1 (ref.)         | 1 (ref.)         |
| Past use                                            | 3 (6.8)   | 6 (2.7)    | 567 (569)                          | 1655 (772)                                          | 3.16 (0.76-13.0) | 4.43 (0.62-31.9) |
| Recent use                                          | 1 (2.3)   | 2 (0.9)    | 299 (199)                          | 448 (87)                                            | 4.89 (0.27-87.1) | 3.40 (0.03-384)  |
| Current use                                         | 9 (20.5)  | 15 (6.8)   | 737 (546)                          | 835 (566)                                           | 3.76 (1.51-9.36) | 4.29 (1.39-13.3) |
| <b>Duration</b>                                     |           |            |                                    |                                                     |                  |                  |
| No use ( $\leq 30$ d)                               | 31 (70.5) | 197 (89.6) | -                                  | -                                                   | 1 (ref.)         | 1 (ref.)         |
| >30 d $\leq 1$ yr                                   | 4 (9.1)   | 8 (3.6)    | 156 (100)                          | 675 (731)                                           | 3.27 (0.92-11.7) | 2.55 (0.47-13.7) |
| >1 yr - $\leq 3$ yr                                 | 4 (9.1)   | 12 (5.5)   | 622 (213)                          | 967 (673)                                           | 2.01 (0.58-6.92) | 1.68 (0.36-7.85) |
| >3 yr                                               | 5 (11.4)  | 3 (1.4)    | 1485 (341)                         | 1587 (346)                                          | 9.18 (2.12-38.9) | 31.9 (4.05-251)  |
| P for trend                                         |           |            |                                    |                                                     | 0.002            | 0.0007           |
| <b>Time since first bisphosphonate prescription</b> |           |            |                                    |                                                     |                  |                  |
| No use ( $\leq 30$ d)                               | 31 (70.5) | 197 (89.6) | -                                  | -                                                   | 1 (ref.)         | 1 (ref.)         |
| >30 d $\leq 1$ yr                                   | 3 (6.8)   | 2 (0.9)    | 142 (120)                          | 150 (130)                                           | 10.0 (1.6-62.0)  | 4.98 (0.56-44.2) |
| >1 yr - $\leq 3$ yr                                 | 4 (9.1)   | 13 (5.9)   | 446 (230)                          | 659 (180)                                           | 1.94 (0.56-6.76) | 1.72 (0.36-8.34) |
| >3 yr                                               | 6 (13.6)  | 8 (3.6)    | 1100 (582)                         | 1737 (540)                                          | 4.71 (1.52-14.6) | 9.46 (2.17-41.3) |
| P for trend**                                       |           |            |                                    |                                                     | 0.03             | 0.01             |

Model 1: Conditional logistic regression model adjusted for matching variables

Model 2: Conditional logistic regression model adjusted for matching variables, smoking, alcoholism, BMI, previous fracture, kidney disease, malabsorption, stroke, dementia, rheumatoid arthritis, diabetes, epilepsy, Parkinson disease, thyroid disease, PPI (no use,  $\leq 1$  yr,  $>1$  yr), anxiolytics, sedatives, antidepressants, antihypertensives, corticosteroids (no use,  $\leq 1$  yr,  $>1$  yr), raloxifene, hormone replacement therapy, and thiazolidinediones.

\* Modeled as the median duration of use in each category; \*\* Modeled as time in days since first bisphosphonate prescription (0 for no users)

## TITLE

### ORAL BISPHOSPHONATES ARE ASSOCIATED WITH INCREASED RISK OF ATYPICAL-FEMORAL-SUBTROCHANTERIC AND DIAPHYSEAL FRACTURES IN ELDERLY WOMEN

Juan Erviti<sup>1</sup>, Álvaro Alonso<sup>2,3</sup>, Belén Oliva<sup>4</sup>, Javier Gorricho<sup>1</sup>, Antonio López<sup>1</sup>, Julia Timoner<sup>4</sup>, Consuelo Huerta<sup>4</sup>, Miguel Gil<sup>4</sup> and Francisco De Abajo<sup>4,5</sup>.

<sup>1</sup>Drug Prescribing Unit, Navarre Health Service, Pamplona, Navarre, Spain; <sup>2</sup>School of Public Health, University of Minnesota, Minneapolis, Minnesota, United States; <sup>3</sup>School of Medicine, University of Navarre, Pamplona, Navarre, Spain; <sup>4</sup>BIFAP Research Unit, Division of Pharmacoepidemiology and Pharmacovigilance, Spanish Agency for Medicines and Medical Devices, Madrid, Spain; and <sup>5</sup>Clinical Pharmacology Unit, University Hospital "Príncipe de Asturias", Department of Pharmacology, University of Alcalá, Madrid, Spain.

## ARTICLE SUMMARY

### Article Focus

. The hypothesis of this study is that oral bisphosphonates may increase atypical femoral fracture risk in elderly women in the long-term use.

### Key messages

. Bisphosphonate use was associated with an increased risk of atypical femoral fractures in elderly women

. A higher risk among long-term bisphosphonate users was observed.

### Strengths and limitations

. The main strength is that the observed odds ratios indicate a strong association between bisphosphonate use and increased atypical femoral fracture risk that can hardly be challenged on grounds of bias in the design.

. One of the main limitations of this study is the small number of cases, which made it unfeasible to perform subgroup or individual drugs analyses. X-ray images were not available. However this may not be a relevant limitation yet hip fracture cases are described in detail in the surgical procedures.

## ABSTRACT

**Background:** Case reports and a few epidemiological studies have shown an increased risk of atypical femoral fractures associated with bisphosphonate use. The evidence is, however, scarce and more formal studies are needed.

**Objectives:** To evaluate the association between bisphosphonate use and risk of atypical femoral fractures among women aged 65 or older.

#### **Methods:**

*Design.* Nested case-control study

*Setting.* The study was performed in a general practice research database in Spain.

*Exposures.* Use of oral bisphosphonates any time before the occurrence of atypical fractures among cases or the corresponding index date among controls. Bisphosphonate use was categorized as ever vs never users. Ever users were divided according to the total time since first prescription.

*Main outcome measures.* Cases were defined as women aged 65 years or older with a first diagnosis of atypical femoral fracture (subtrochanteric or diaphyseal), recorded in the BIFAP database between 01/01/2005 and 31/12/2008, and with at least one year of follow-up before the index date. All cases were validated. For each case, 5 age- and calendar year-matched controls without history of hip or atypical fracture were randomly selected from the database.

*Statistical analysis.* OR and 95%CI of atypical femoral fracture by bisphosphonate use were determined using conditional logistic regression. Models were adjusted for comorbidities and use of other medications

**Results:** The analysis included 44 cases and 220 matched controls (mean age, 82 years). Ever use of bisphosphonates was more frequent in cases than controls (29.6% vs 10.5%). In multivariate analyses, OR (95%CI) of atypical femoral fracture was 4.30 (1.55-11.9) in ever vs never users of bisphosphonates. The risk increased with long-term use, with an OR of 9.46 (2.17-41.3) comparing those using bisphosphonates over 3 years vs no users ( $p$  for trend=0.01).

**Conclusions:** Bisphosphonate use was associated with an increased risk of subtrochanteric or diaphyseal atypical femoral fractures in elderly women in a low fracture risk population, with a higher risk among long-term bisphosphonate users.

## **INTRODUCTION**

### **Background**

In 2005, *Odvin* et al published the first paper warning about the potentially harmful effects of alendronate due to suppression of bone remodelling.<sup>1</sup> Spontaneous fractures were observed in 9 patients receiving long-term treatment with the drug (between 3-8 years). It was hypothesized that bisphosphonate long-term use might increase the risk of fracture and cause difficulties in repairing fractures in some patients.

Then more cases and short series of cases were described.<sup>2-11</sup> During 2009 a case-control study was carried out to evaluate the association between low impact femur fractures and the long-term use of bisphosphonates.<sup>12</sup> A comparison was made between 41 subtrochanteric or diaphyseal fractures with 82 control patients with femoral or inter-trochanteric fractures. A strong association was found between the use of bisphosphonates and atypical fractures. At the same time, a typical radiological pattern was described for the fractures related to bisphosphonates. During the same year more cases and series of cases of femur fractures associated with the use of bisphosphonates were published.<sup>13-16</sup> The capacity of bisphosphonates to weaken bone structure is reflected in an article that describes a series of seven cases of bilateral fractures or sequential cases of low impact

fractures all associated with the treatment with alendronate for at least five years.<sup>17</sup> These included one patient with simultaneous bilateral femur fractures affecting the diaphysis, two patients with sequential subtrochanteric fractures and four patients in whom a contralateral subtrochanteric fracture was discovered after diagnosing the initial fracture.

Finally, in two cohort analyses bisphosphonate use was associated with a much higher relative risk of atypical fractures<sup>18,19</sup> (17 and 47-fold higher, respectively) while a recent case-control study showed a 3-fold increase in bisphosphonate users.<sup>20</sup> More studies in different populations with sufficient sample size are needed in order to shed more light on the use of bisphosphonates and atypical fracture risk.

### **Objective**

The aim of this study is to evaluate the association between use of bisphosphonates and risk of ~~subtrochanteric or diaphyseal atypical femoral~~ fractures among women aged 65 years or older in a Mediterranean population. We hypothesized that oral bisphosphonates could increase ~~subtrochanteric or diaphyseal atypical~~ fracture risk.

## **METHODS**

### **Study design and setting**

We carried out a case-control study nested in the Spanish database BIFAP (*Base de Datos para la Investigación Farmacoepidemiológica en Atención Primaria*, Database for Pharmacoepidemiologic Research in Primary Care). This is a longitudinal population-based database maintained by the Spanish Agency for Medicines and Medical Devices that collects, from 2001 onwards, the computerized medical records of >3.2 million patients attended by more than 1,800 primary care physicians throughout Spain. It includes anonymized information on >13.7 million person-years of follow up.<sup>21,22</sup> This project was approved by the Navarre Research Ethics Board, Pamplona, Spain.

### **Participants**

Cases were defined as women aged 65 years or older with a first diagnosis of ~~atypical femoral fracture~~ (subtrochanteric or diaphyseal) fracture, recorded between 01/01/2005 and 31/12/2008, and with at least 1 year of follow-up in BIFAP before the event date. Pre-selected cases for hip fracture were identified by both ICD-10 codes and free text searching. All clinical records of the potential cases were manually reviewed by the BIFAP team blinded to the exposure status. The date of hospitalization served as the index date. We excluded women with any history of cancer, Paget disease, prevalent hip fracture and fractures resulting from trauma or motor vehicle collisions. For each case, 5 controls with no history of hip fracture at the time of the index date of their corresponding case were selected, matched by same age and calendar year of enrolment in BIFAP.

### **Medication use and other covariates**

1  
2  
3  
4  
5  
6 Use of bisphosphonates before the index date was obtained from the computerized  
7 database. Duration of bisphosphonate exposure was evaluated by examining  
8 prescriptions for oral alendronate, risedronate, ibandronate or etidronate from the  
9 beginning of therapy to the index date or the corresponding date among controls  
10 (ATC codes: alendronate, M05BA04; alendronate plus vitamin D, M05BB;  
11 risedronate, M05BA07 and ibandronate, M05BA06).

12 Individuals were classified as ever vs never users. [Ever users were those with at](#)  
13 [least one prescription, with no minimum duration](#). Ever users were also divided into  
14 *current users* (if most recent prescription lasted through index date or ended in the  
15 month before it), *recent users* (if most recent prescription ended between 1 and 6  
16 months before index date) and *past users* (if most recent prescription ended more  
17 than 6 months before index date).

18 In order to assess the effects of treatment length on the outcomes four different  
19 subgroups were considered [based on cumulative duration of actual treatment](#),  
20 namely 30 days or less; >30 days to ≤1 year; >1 to ≤3 years and over 3 years. The  
21 effects of [time of](#) bisphosphonate exposure on atypical hip fracture risk were also  
22 analyzed. Exposure was measured as the time (in days) since the first prescription.  
23

24 Information on comorbidities (ICPC-2 codes) and use of other medications (ATC  
25 codes) was obtained. Cumulative total days of treatment was calculated for each  
26 individual drug. Time between last prescription and index date was also calculated.  
27 Other variables such as weight (kg), height (cm), body mass index (kg/m<sup>2</sup>) and  
28 smoking status (yes/no/past smoker) were obtained as well.  
29

### 30 **Statistical methods**

31  
32 We used conditional logistic regression to estimate the odds ratios (ORs) and 95  
33 percent confidence intervals (CIs) for the association between bisphosphonate  
34 exposure (ever vs. never) and hip fractures. Treatment duration was assessed as  
35 well and results were tested to identify a trend. [Tests for trend were performed](#)  
36 [assigning the median to each category of ordinal variables, and including that value](#)  
37 [as a continuous variable in the models](#). The level of significance was established at p  
38 = 0.05.

39 An initial model adjusted only for matching variables. A second model adjusted  
40 additionally for smoking, BMI, alcoholism, previous fracture, kidney disease,  
41 malabsorption, stroke, dementia, rheumatoid arthritis, diabetes, epilepsy,  
42 Parkinson disease, thyroid disease, and use of PPI (no use, ≤1 yr, >1 yr),  
43 anxiolytics, sedatives, antidepressants, antihypertensives, corticosteroids (no use,  
44 ≤1 yr, >1 yr), raloxifene, hormone replacement therapy, and thiazolidinediones.  
45

## 46 **RESULTS**

47  
48  
49  
50  
51 Between 2005 and 2008, 45 atypical fractures (31 subtrochanteric and 14 shaft  
52 fractures) were observed. The average age of cases was 82.2 ± 6.7 years. Previous  
53 fractures and drug use was more prevalent in cases than in controls (table 1).  
54  
55  
56  
57  
58  
59  
60

1  
2  
3  
4  
5  
6 Ever use of bisphosphonates was more frequent in cases than in controls, 13  
7 (29.6%) vs 23 (10.5%) yielding to an adjusted OR = 4.30 (95%CI, 1.55-11.9).  
8 Within ever users no apparent difference was observed between current, recent or  
9 past users, although numbers were quite small. A duration-dependent association  
10 was suggested, with higher risk among those with longer exposure to  
11 bisphosphonates (> 3 years, OR = 9.46 (95%CI, 2.17-41.3) (table 2). The results  
12 by individual drugs are not shown because of insufficient sample size.

## 13 14 15 16 DISCUSSION

### 17 18 19 **Key results**

20  
21 Our findings show an increase of atypical fracture risk among *ever users* of  
22 bisphosphonates vs *never users*, and a distinct duration-response association, with  
23 higher risk among women using bisphosphonates for longer time period. Results did  
24 not vary for bisphosphonate use timing (current use, recent use, past use). Since  
25 these drugs accumulate in the bone and remain there for years this grading system  
26 may not make any relevant difference, being more important the overall cumulative  
27 exposure expressed as time in days since the first prescription. Both unadjusted and  
28 adjusted data show a duration-dependent association between bisphosphonate use  
29 and higher risk of atypical fractures.

30 Both cohort and case-control studies show an increased risk of atypical fractures  
31 associated with bisphosphonate use. Our results are similar to those obtained in the  
32 largest case-control study published so far<sup>20</sup> and show an overall 4-fold higher risk.  
33 In this study an association between long-term use and higher risk was also  
34 observed. In two cohort studies overall fracture risk observed was much higher.<sup>18,19</sup>

35 A recent study also found a higher atypical femoral fracture risk associated with  
36 bisphosphonate use when classic fractures are used as controls. In this study longer  
37 duration of treatment resulted in augmented risk.<sup>23</sup> Another cohort study with a  
38 follow-up period of 10 years also found that the incidence of atypical fractures  
39 increases with longer duration of bisphosphonate use.<sup>24</sup>

Formatted: Superscript

Formatted: Superscript

40 Bisphosphonates induce apoptosis of the osteoclasts and inhibit bone resorption.  
41 However, during the normal process of bone remodeling the formation of bone  
42 produced by osteoblasts is induced by osteoclasts, which implies that on reducing  
43 the resorptive activity, there is also an accompanying reduction in bone formation.  
44 The greater bone density observed after treatment with bisphosphonates may thus  
45 reflect bone weakness and not strength given the increase of mineral content in the  
46 bone. Bisphosphonates also weaken the collagen structure and produce an  
47 accumulation of microscopic injuries in bone structure. Biologically, this makes it  
48 plausible that long-term bisphosphonate use would increase the risk of fracture and  
49 cause difficulty in repairing fractures.

50 Deleterious effects on bone structure have been observed with both  
51 bisphosphonates and denosumab but not with other drugs used for osteoporosis.  
52 Both type of drugs inhibit the activity of osteoclasts and thereby bone resorption.  
53 Since osteoblastic bone formation follows osteoclastic resorption during normal  
54 bone remodelling, the inhibition of resorption is accompanied by a decrease in bone  
55 formation. In other words, bone strength may be weaker as normal turnover is  
56 inhibited. Furthermore bisphosphonates prolong secondary mineralization leading to

1  
2  
3  
4  
5  
6 increased BMD but decreased bone strength due to a higher mineral content (brittle  
7 bones).

8  
9 A typical radiological pattern was described for the fractures related to  
10 bisphosphonates and a high association between the use of bisphosphonates and  
11 the appearance of this radiological pattern.<sup>253</sup> Also Koh et al determined that  
12 atypical lesions are more frequent in femur regions of maximal tension loading.<sup>264</sup>  
13 Thereby there is biological, radiological and mechanical rationale for an increase in  
14 atypical fracture risk associated with the use of bisphosphonates.

### 15 **Limitations**

16  
17 One of the main limitations of this study is the small number of cases, which made  
18 it unfeasible to perform subgroup or individual drugs analyses, and led to wide  
19 confidence intervals in the estimates of association. Also we relied on prescription  
20 data to determine exposure status and duration of bisphosphonate exposure. It is  
21 sensible to think that real exposure will surely be lower than registered to some  
22 extent. However, this will most probably represent a non-differential  
23 misclassification that would distort the result towards the null value. Therefore,  
24 given that our findings show an increase in atypical fracture risk associated with  
25 bisphosphonate use we may assume that it represents a conservative estimate.

26  
27 Bone mineral density determination is not a standard test available in the public  
28 health system in Spain. Thereby information on bone density in clinical records was  
29 rather scarce. In any case, this test has a very poor fracture risk predictive value  
30 and its clinical relevance can be challenged. In the present analysis, we adjusted for  
31 other bone-related variables. One of these prevalence of previous fractures might  
32 confound the association between bisphosphonate use and risk of fracture. In order  
33 to minimize confounding by indication bias, results were adjusted for previous  
34 fractures, comorbidities and use of other medications.

35 Finally, our study had a case-control design and not a cohort design, which is  
36 supposed to be a stronger method. However, our cases and controls were selected  
37 from a well-defined cohort, reducing the possibility of selection bias, and  
38 information on treatment use and comorbidities was recorded before hip fractures  
39 occurred, making differential misclassification of the exposure less likely.

### 40 **CONCLUSION**

41  
42 Bisphosphonate use was associated with an increased risk of subtrochanteric or  
43 diaphyseal atypical femoral fractures in elderly women in a Mediterranean low  
44 fracture risk population, with a higher risk among long-term bisphosphonate users.

### 45 **Acknowledgements**

46  
47 The authors would like to thank the collaboration of general practitioners  
48 contributing to BIFAP.

### 49 **Funding**

50  
51 This study received a grant by the Spanish Ministry of Health, SAS/2481/2009  
52 (TRA-071)



## References

<sup>1</sup> Odvina CV, Zerwekh JE, Rao DS, Maalouf N, Gottschalk FS and Pak CYC. Severely suppressed bone turnover: a potential complication of alendronate therapy. *J Clin Endocrinol Metab* 2005;90:1294-1301.

<sup>2</sup> Schneider JP. Should bisphosphonates be continued indefinitely? An unusual fracture in a healthy woman on long-term alendronate. *Geriatrics* 2006; 61(1):31-33.

<sup>3</sup> Cheung R, Leung KK, Lee KC and Chow TC. Sequential non-traumatic femoral shaft fractures in a patient on long-term alendronate. *Hong Kong Med J* 2007;13(6):485-9.

<sup>4</sup> Lee P, van der Wall H, and Seibel MJ. Looking beyond low bone mineral density: multiple insufficiency fractures in a woman with post-menopausal osteoporosis on alendronate therapy. *J Endocrinol Invest* 2007;30:590-97.

<sup>5</sup> Goh SK, Yang KY, Koh JSB, Wong MK, Chua SY, Chua DTC and Howe TS. Subtrochanteric insufficiency fractures in patients on alendronate therapy. A caution. *J Bone Joint Surg (Br)* 2007;89-B:349-53.

<sup>6</sup> Sayed-Noor AS and Sjöden GO. Subtrochanteric displaced insufficiency fracture after long-term alendronate therapy – a case report. *Acta Orthopædica* 2008;79(4):565-567

<sup>7</sup> Visekruna M, Wilson D, and McKiernan FE. Severely suppressed bone turnover and atypical skeletal fragility. *J Clin Endocrinol Metabol* 2008;93(8):2948-2952.

<sup>8</sup> Kwek EBK, Koh JSB and Howe TS. More on atypical fractures of the femoral diaphysis (letter). *N Engl J Med* 2008;359(3):316-318.

<sup>9</sup> Lenart BA, Lorich DG, and Lane JM. Atypical fractures of the femoral diaphysis in postmenopausal women taking alendronate (letter). *N Engl J Med* 2008;358(12):1304-1306.

<sup>10</sup> Kwek EBK, Goh SK, Koh JSB Png MA and Howe TS. An emerging pattern of subtrochanteric stress fractures: a long-term complication of alendronate therapy? *Injury* 2008;39:224-31.

<sup>11</sup> Neviasser AS, Lane JM, Lenart BA, Edobor-Osula F, and Lorich DG. Low-energy femoral shaft fractures associated with alendronate use. *J Orthop Trauma* 2008;22(5):346-350.

<sup>12</sup> Lenart BA, Neviasser AS, Lyman S, Chang CC, Edobor-Osula F, Steele B et al. Association of low-energy femoral fractures with prolonged bisphosphonate use: a case control study. *Osteoporos Int* 2009;20:1353-1362.

<sup>13</sup> Sabed-Noor AS, and Sjöden GO. Two femoral insufficiency fractures after long-term alendronate therapy. *Clin Orthop Relat Res* 2009;467:1921-6.

<sup>14</sup> Ing-Lorenzini K, Desmeules J, Plachta O, Suva D, Dayer P, and Peter R. Low-energy femoral fractures associated with the long-term use of bisphosphonates. A case series from a Swiss University Hospital. *Drug Safety* 2009;32(9):775-785.

<sup>15</sup> Goddard MS, Kristoff RR, Johnston JC, and Khanuja HS. A traumatic bilateral femur fracture in long-term bisphosphonate use. *Orthopedics* 2009;32:607.

<sup>16</sup> Odvina CV, Levy S, Rao S, Zerwekh JE, and Rao S. Unusual mid-shaft fractures during long term bisphosphonate therapy. *Clin Endocrinol (Oxf)*, doi: 10.1111/j.1365-2265.2009.03581.x

<sup>17</sup> Capecci CM and Tejwani NC. Bilateral low-energy simultaneous or sequential femoral fractures in patients on long-term alendronate therapy. *J Bone Joint Surg Am* 2009;91:2556-61

<sup>18</sup> Giusti A, Hamdy NA, Dekkers OM, Ramautar SR, Dijkstra S, Papapoulos SE. Atypical fractures and bisphosphonate therapy: a cohort study of patients with femoral fracture with radiographic adjudication of fracture site and features. *Bone*. 2011;48(5):966-71.

<sup>19</sup> Schilcher J, Michaëlsson K, Aspenberg P. Bisphosphonate use and atypical fractures of the femoral shaft. *N Engl J Med*. 2011;364(18):1728-37.

<sup>20</sup> Park-Wyllie LY, Mamdani MM, Juurlink DN, Hawker GA, Gunraj N, Austin PC, et al. Bisphosphonate use and the risk of subtrochanteric or femoral shaft fractures in older women. *JAMA* 2011;305(8):783-9.

<sup>21</sup> Salvador Rosa J.C, Moreno Pérez D, Sonogo García Rodríguez LA, de Abajo Iglesias FJ. El Proyecto BIFAP: Base de datos para la Investigación. *Aten Primaria* 2002; 30: 655-661.

<sup>22</sup> Agencia Española de Medicamentos y Productos Sanitarios. Proyecto BIFAP <http://www.bifap.org/summary.php>

<sup>23</sup> Meier RPH, Perneger TV, Stern R, Rizzoli R, Peter RE. Increasing occurrence of atypical femoral fractures associated with bisphosphonate use. *Arch Intern Med* 2012;172(12):930-936.

<sup>24</sup> Dell RM, Adams AL, Greene DF, Funahashi TT, Silverman SL, Eisemon EO, et al. Incidence of Atypical Nontraumatic Diaphyseal Fractures of the Femur. *JBMR* 2012;27(12):2544-2550.

Formatted: Font: Times New (W1), Superscript

Formatted: Font: Times New (W1), Superscript

Formatted: English (U.K.)

- 1  
2  
3  
4  
5  
6 | <sup>253</sup> Lenart BA, Neviasser AS, Lyman S, Chang CC, Edobor-Osula F, Steele B et al. Association of low-  
7 energy femoral fractures with prolonged bisphosphonate use: a case control study. *Osteoporos Int* 2009;  
8 20:1353-1362.  
9 | <sup>264</sup> Koh JSB, Goh SK, Png MA, Ng ACM, Howe TS. Distribution of atypical fractures and cortical stress  
10 lesions in the femur: implications on pathophysiology. *Singapore Med J* 2011;52(2):77-80  
11  
12  
13  
14  
15  
16  
17  
18  
19  
20  
21  
22  
23  
24  
25  
26  
27  
28  
29  
30  
31  
32  
33  
34  
35  
36  
37  
38  
39  
40  
41  
42  
43  
44  
45  
46  
47  
48  
49  
50  
51  
52  
53  
54  
55  
56  
57  
58  
59  
60

**Formatted:** Font: Times New (W1),  
Superscript

For peer review only

**Table 1. Characteristics of cases and controls**

|                                                | <b>Cases</b> | <b>Controls</b> |
|------------------------------------------------|--------------|-----------------|
| N                                              | 44           | 220             |
| Age, years ( $\pm$ SD)                         | 82.2 (6.7)   | 82.2 (6.6)      |
| Smoking                                        |              |                 |
| Non-current smoker, %                          | 77.3         | 70.9            |
| Current smoker, %                              | 2.3          | 3.2             |
| Not recorded, %                                | 20.5         | 25.9            |
| Alcoholism, %                                  | 0.0          | 0.0             |
| Body mass index, kg/m <sup>2</sup> ( $\pm$ SD) | 29.4 (4.9)   | 29.1 (5.3)      |
| <20 kg/m <sup>2</sup> , %                      | 0.0          | 1.4             |
| 20-<25 kg/m <sup>2</sup> , %                   | 9.1          | 14.1            |
| 25-<30 kg/m <sup>2</sup> , %                   | 29.6         | 25.0            |
| $\geq$ 30 kg/m <sup>2</sup> , %                | 31.8         | 32.3            |
| Not recorded, %                                | 29.6         | 27.1            |
|                                                |              |                 |
| <b>Comorbidities</b>                           |              |                 |
| Previous fracture, %                           | 20.5         | 8.2             |
| Kidney disease, %                              | 4.6          | 5.0             |
| Malabsorption, %                               | 2.3          | 1.4             |
| Stroke, %                                      | 9.1          | 6.4             |
| Dementia, %                                    | 9.1          | 8.6             |
| Rheumatoid arthritis, %                        | 2.3          | 1.4             |
| Diabetes, %                                    | 18.2         | 20.5            |
| Epilepsy, %                                    | 2.3          | 0.5             |
| Parkinson disease, %                           | 0.0          | 1.8             |
| Thyroid disease, %                             | 9.1          | 13.2            |
|                                                |              |                 |
| <b>Use of medication</b>                       |              |                 |
| PPI or H2 receptor blocker, %                  | 34.1         | 33.2            |
| Anxiolytic, %                                  | 22.7         | 24.1            |
| Antidepressants, %                             | 9.1          | 19.6            |
| Antihypertensives, %                           | 50.0         | 60.9            |
| Oral corticosteroids, %                        | 4.6          | 7.3             |
| Sedatives, %                                   | 9.1          | 6.8             |
| Raloxifene, %                                  | 0.0          | 2.3             |
| Hormone replacement therapy, %                 | 0.0          | 0.0             |
| Thiazolidinedione, %                           | 0.0          | 0.0             |

Values correspond to percentage or means (standard deviation)

**Table 2. Association of any bisphosphonate use with the risk of atypical femoral fracture**

|                                              | Cases     | Controls   | Average cumulative duration (days) | Time since first bisphosphonate prescription (days) | Model 1          | Model 2          |
|----------------------------------------------|-----------|------------|------------------------------------|-----------------------------------------------------|------------------|------------------|
|                                              | n (%)     | n (%)      | Mean (SD)                          | Mean (SD)                                           | OR (95% CI)      | OR (95% CI)      |
| Use                                          |           |            |                                    |                                                     |                  |                  |
| No use                                       | 31 (70.5) | 197 (89.5) | -                                  | -                                                   | 1 (ref.)         | 1 (ref.)         |
| Ever use                                     | 13 (29.6) | 23 (10.5)  | 658 (538)                          | 1007 (708)                                          | 3.63 (1.64-8.02) | 4.30 (1.55-11.9) |
| Timing                                       |           |            |                                    |                                                     |                  |                  |
| No use                                       | 31 (70.5) | 197 (89.5) | -                                  | -                                                   | 1 (ref.)         | 1 (ref.)         |
| Past use                                     | 3 (6.8)   | 6 (2.7)    | 567 (569)                          | 1655 (772)                                          | 3.16 (0.76-13.0) | 4.43 (0.62-31.9) |
| Recent use                                   | 1 (2.3)   | 2 (0.9)    | 299 (199)                          | 448 (87)                                            | 4.89 (0.27-87.1) | 3.40 (0.03-384)  |
| Current use                                  | 9 (20.5)  | 15 (6.8)   | 737 (546)                          | 835 (566)                                           | 3.76 (1.51-9.36) | 4.29 (1.39-13.3) |
| Duration                                     |           |            |                                    |                                                     |                  |                  |
| No use                                       | 31 (70.5) | 197 (89.6) | -                                  | -                                                   | 1 (ref.)         | 1 (ref.)         |
| ≤1 yr                                        | 4 (9.1)   | 8 (3.6)    | 156 (100)                          | 675 (731)                                           | 3.27 (0.92-11.7) | 2.55 (0.47-13.7) |
| >1 yr - ≤3 yr                                | 4(9.1)    | 12 (5.5)   | 622 (213)                          | 967 (673)                                           | 2.01 (0.58-6.92) | 1.68 (0.36-7.85) |
| >3 yr                                        | 5 (11.4)  | 3 (1.4)    | 1485 (341)                         | 1587 (346)                                          | 9.18 (2.12-38.9) | 31.9 (4.05-251)  |
| P for trend                                  |           |            |                                    |                                                     | 0.002            | 0.0007           |
| Time since first bisphosphonate prescription |           |            |                                    |                                                     |                  |                  |
| No use                                       | 31 (70.5) | 197 (89.6) | -                                  | -                                                   | 1 (ref.)         | 1 (ref.)         |
| <1 yr                                        | 3 (6.8)   | 2 (0.9)    | 142 (120)                          | 150 (130)                                           | 10.0 (1.6-62.0)  | 4.98 (0.56-44.2) |
| 1 - <3yr                                     | 4 (9.1)   | 13 (5.9)   | 446 (230)                          | 659 (180)                                           | 1.94 (0.56-6.76) | 1.72 (0.36-8.34) |
| ≥3 yr                                        | 6 (13.6)  | 8 (3.6)    | 1100 (582)                         | 1737 (540)                                          | 4.71 (1.52-14.6) | 9.46 (2.17-41.3) |
| P for trend**                                |           |            |                                    |                                                     | 0.03             | 0.01             |

Model 1: Conditional logistic regression model adjusted for matching variables

Model 2: Conditional logistic regression model adjusted for matching variables, smoking, alcoholism, BMI, previous fracture, kidney disease, malabsorption, stroke, dementia, rheumatoid arthritis, diabetes, epilepsy, Parkinson disease, thyroid disease, PPI (no use, ≤1 yr, >1 yr), anxiolytics, sedatives, antidepressants, antihypertensives, corticosteroids (no use, ≤1 yr, >1 yr), raloxifene, hormone replacement therapy, and thiazolidinediones.

\* Modeled as the median duration of use in each category; \*\* Modeled as time in days since first bisphosphonate prescription (0 for no users)

**STROBE 2007 (v4) checklist of items to be included in reports of observational studies in epidemiology\***  
**Checklist for cohort, case-control, and cross-sectional studies (combined)**

| Section/Topic             | Item # | Recommendation                                                                                                                                                                                                                                                                                                                                                                                                                                                                   | Reported on page # |
|---------------------------|--------|----------------------------------------------------------------------------------------------------------------------------------------------------------------------------------------------------------------------------------------------------------------------------------------------------------------------------------------------------------------------------------------------------------------------------------------------------------------------------------|--------------------|
| Title and abstract        | 1      | (a) Indicate the study’s design with a commonly used term in the title or the abstract. <b>OK</b>                                                                                                                                                                                                                                                                                                                                                                                |                    |
|                           |        | (b) Provide in the abstract an informative and balanced summary of what was done and what was found <b>OK</b>                                                                                                                                                                                                                                                                                                                                                                    |                    |
| <b>Introduction</b>       |        |                                                                                                                                                                                                                                                                                                                                                                                                                                                                                  |                    |
| Background/rationale      | 2      | Explain the scientific background and rationale for the investigation being reported <b>OK</b>                                                                                                                                                                                                                                                                                                                                                                                   |                    |
| Objectives                | 3      | State specific objectives, including any pre-specified hypotheses <b>OK</b>                                                                                                                                                                                                                                                                                                                                                                                                      |                    |
| <b>Methods</b>            |        |                                                                                                                                                                                                                                                                                                                                                                                                                                                                                  |                    |
| Study design              | 4      | Present key elements of study design early in the paper <b>OK</b>                                                                                                                                                                                                                                                                                                                                                                                                                |                    |
| Setting                   | 5      | Describe the setting, locations, and relevant dates, including periods of recruitment, exposure, follow-up, and data collection <b>OK</b>                                                                                                                                                                                                                                                                                                                                        |                    |
| Participants              | 6      | (a) <i>Cohort study</i> —Give the eligibility criteria, and the sources and methods of selection of participants. Describe methods of follow-up<br><i>Case-control study</i> —Give the eligibility criteria, and the sources and methods of case ascertainment and control selection. Give the rationale for the choice of cases and controls <b>OK</b><br><i>Cross-sectional study</i> —Give the eligibility criteria, and the sources and methods of selection of participants |                    |
|                           |        | (b) <i>Cohort study</i> —For matched studies, give matching criteria and number of exposed and unexposed<br><i>Case-control study</i> —For matched studies, give matching criteria and the number of controls per case <b>OK</b>                                                                                                                                                                                                                                                 |                    |
| Variables                 | 7      | Clearly define all outcomes, exposures, predictors, potential confounders, and effect modifiers. Give diagnostic criteria, if applicable <b>OK</b>                                                                                                                                                                                                                                                                                                                               |                    |
| Data sources/ measurement | 8*     | For each variable of interest, give sources of data and details of methods of assessment (measurement). Describe comparability of assessment methods if there is more than one group <b>OK</b>                                                                                                                                                                                                                                                                                   |                    |
| Bias                      | 9      | Describe any efforts to address potential sources of bias <b>OK</b>                                                                                                                                                                                                                                                                                                                                                                                                              |                    |
| Study size                | 10     | Explain how the study size was arrived at <b>OK</b>                                                                                                                                                                                                                                                                                                                                                                                                                              |                    |
| Quantitative variables    | 11     | Explain how quantitative variables were handled in the analyses. If applicable, describe which groupings were chosen and why <b>OK</b>                                                                                                                                                                                                                                                                                                                                           |                    |
| Statistical methods       | 12     | (a) Describe all statistical methods, including those used to control for confounding <b>OK</b>                                                                                                                                                                                                                                                                                                                                                                                  |                    |
|                           |        | (b) Describe any methods used to examine subgroups and interactions <b>OK</b>                                                                                                                                                                                                                                                                                                                                                                                                    |                    |
|                           |        | (c) Explain how missing data were addressed <b>OK</b>                                                                                                                                                                                                                                                                                                                                                                                                                            |                    |
|                           |        | (d) <i>Cohort study</i> —If applicable, explain how loss to follow-up was addressed<br><i>Case-control study</i> —If applicable, explain how matching of cases and controls was addressed <b>OK</b>                                                                                                                                                                                                                                                                              |                    |

|                          |     |                                                                                                                                                                                                                        |  |
|--------------------------|-----|------------------------------------------------------------------------------------------------------------------------------------------------------------------------------------------------------------------------|--|
|                          |     | <i>Cross-sectional study</i> —If applicable, describe analytical methods taking account of sampling strategy                                                                                                           |  |
|                          |     | (e) Describe any sensitivity analyses                                                                                                                                                                                  |  |
| <b>Results</b>           |     |                                                                                                                                                                                                                        |  |
| Participants             | 13* | (a) Report numbers of individuals at each stage of study—eg numbers potentially eligible, examined for eligibility, confirmed eligible, included in the study, completing follow-up, and analysed <b>OK</b>            |  |
|                          |     | (b) Give reasons for non-participation at each stage <b>Not applicable</b>                                                                                                                                             |  |
|                          |     | (c) Consider use of a flow diagram <b>Not applicable</b>                                                                                                                                                               |  |
| Descriptive data         | 14* | (a) Give characteristics of study participants (eg demographic, clinical, social) and information on exposures and potential confounders <b>OK</b>                                                                     |  |
|                          |     | (b) Indicate number of participants with missing data for each variable of interest <b>OK</b>                                                                                                                          |  |
|                          |     | (c) <i>Cohort study</i> —Summarise follow-up time (eg, average and total amount)                                                                                                                                       |  |
| Outcome data             | 15* | <i>Cohort study</i> —Report numbers of outcome events or summary measures over time                                                                                                                                    |  |
|                          |     | <i>Case-control study</i> —Report numbers in each exposure category, or summary measures of exposure <b>OK</b>                                                                                                         |  |
|                          |     | <i>Cross-sectional study</i> —Report numbers of outcome events or summary measures                                                                                                                                     |  |
| Main results             | 16  | (a) Give unadjusted estimates and, if applicable, confounder-adjusted estimates and their precision (eg, 95% confidence interval). Make clear which confounders were adjusted for and why they were included <b>OK</b> |  |
|                          |     | (b) Report category boundaries when continuous variables were categorized <b>OK</b>                                                                                                                                    |  |
|                          |     | (c) If relevant, consider translating estimates of relative risk into absolute risk for a meaningful time period                                                                                                       |  |
| Other analyses           | 17  | Report other analyses done—eg analyses of subgroups and interactions, and sensitivity analyses <b>OK</b>                                                                                                               |  |
| <b>Discussion</b>        |     |                                                                                                                                                                                                                        |  |
| Key results              | 18  | Summarise key results with reference to study objectives <b>OK</b>                                                                                                                                                     |  |
| Limitations              | 19  | Discuss limitations of the study, taking into account sources of potential bias or imprecision. Discuss both direction and magnitude of any potential bias <b>OK</b>                                                   |  |
| Interpretation           | 20  | Give a cautious overall interpretation of results considering objectives, limitations, multiplicity of analyses, results from similar studies, and other relevant evidence <b>OK</b>                                   |  |
| Generalisability         | 21  | Discuss the generalisability (external validity) of the study results <b>OK</b>                                                                                                                                        |  |
| <b>Other information</b> |     |                                                                                                                                                                                                                        |  |
| Funding                  | 22  | Give the source of funding and the role of the funders for the present study and, if applicable, for the original study on which the present article is based <b>OK</b>                                                |  |

\*Give information separately for cases and controls in case-control studies and, if applicable, for exposed and unexposed groups in cohort and cross-sectional studies.

**Note:** An Explanation and Elaboration article discusses each checklist item and gives methodological background and published examples of transparent reporting. The STROBE checklist is best used in conjunction with this article (freely available on the Web sites of PLoS Medicine at <http://www.plosmedicine.org/>, Annals of Internal Medicine at <http://www.annals.org/>, and Epidemiology at <http://www.epidem.com/>). Information on the STROBE Initiative is available at [www.strobe-statement.org](http://www.strobe-statement.org).

1  
2  
3 **Manuscript ID bmjopen-2012-002091 entitled "ORAL BISPHOSPHONATES**  
4 **ARE ASSOCIATED WITH INCREASED RISK OF ATYPICAL FEMORAL**  
5 **FRACTURES IN ELDERLY WOMEN"**  
6

7 Let us first express our gratitude to the reviewers for their relevant inputs to the  
8 manuscript. Their contribution clearly improved the quality of the draft. Please find  
9 below our response to the reviewers' comments (text in blue colour)

10  
11 **Reviewer: Donald Morrish MD**

12 362 HMRC

13 University of Alberta

14 Edmonton, Alberta, Canada T6G2C8

15 Professor of Medicine, Division of Endocrinology and Metabolism No competing  
16 interests.

17  
18 The literature is adequately quoted

19  
20 The study is well done within the limitations stated by the authors. However there  
21 is a rather small sample size compared to the largest study reported, by Park-  
22 Wyllie et al (2011) which had 716 atypical fractures. I am not sure this study  
23 therefore adds anything new to the literature.

24  
25 We agree the study published by Park-Wyllie et al (2011) has a much larger sample  
26 size. Apart from this study, there are just a few studies with a sample size around  
27 40 cases. One peculiarity about our study is that it was carried out in a  
28 Mediterranean population, with a lower risk for bone fractures compared to Anglo-  
29 Saxon or Northern European countries (Kanis JA, et al. International variations in  
30 hip fracture probabilities: implications for risk assessment. JBMR 2002;17:1237-  
31 1244). It could be hypothesized that, because of the lower risk of fractures in the  
32 Spanish population, the association between bisphosphonates and subtrochanteric  
33 or diaphyseal fractures might not be evident. However that was not the case and  
34 our findings support this association even in a low-risk population.

35  
36 Because of rather small sample size, studies on atypical fractures bear a high risk  
37 of bias. Thereby it is important to replicate them in different populations and  
38 databases. BIFAP database is a non-profit research project operated by the Spanish  
39 Medicines Agency, a public agency belonging to the Spanish Department of Health.  
40 The Spanish Medicines Agency guarantees the quality of the database. The fact that  
41 our study presents outcomes consistent with the findings in other similar studies  
42 supports the association between the use of bisphosphonates and the incidence of  
43 subtrochanteric and diaphyseal fracture risk.

44  
45 The study is well done, but the sample size is rather small. The study duplicates  
46 other small studies and reaches the same conclusion. Since the database contains  
47 over 3.2 million patients, could more atypical fractures be found? This would make  
48 the study much stronger. (The Park-Wyllie study had 716 atypical fractures)

49  
50 Please find below the main differences between the Park-Wyllie study and ours that  
51 may explain the different number of cases found in each study:

52  
53 Park-Wyllie study includes cases registered during 6 years (April 1st 2003 to March  
54 31st 2009) whereas in our study this is a 4-year period instead (January 1<sup>st</sup> 2005 to  
55 December 31<sup>st</sup> 2008). The average follow-up period was 7 years in Park-Wyllie  
56 study and 2.75±1.94 years in our study.

57  
58 Park-Wyllie study includes a cohort of some 800,000 women aged >68 years using  
59 bisphosphonates. Our study had a total population of 3.2 million patients but our  
60



1  
2  
3 cohort of women aged >65 years included approximately 280,000 individuals. As  
4 well as being a larger cohort, Park-Wyllie included women at higher risk of fracture,  
5 eg previous fractures in 70% of patients in Park-Wyllie and 20% in our study (see  
6 Baseline Characteristics of Cases and Controls in each study).  
7

8 Finally, Spanish populations have a lower risk of fracture compared with the Anglo-  
9 Saxon populations after adjusting for number of risk factors.  
10

11  
12  
13 **Reviewer: Lydia Gedmintas**

14 Rheumatology clinical research fellow  
15 Brigham and Women's Hospital  
16 USA  
17

18 This is a very timely topic of research.  
19

20 At this point in the study of the association of bisphosphonates and atypical femur  
21 fracture, it is important to attempt to confirm radiographic confirmation of these  
22 fractures. If this is not possible with the dataset used, the authors should address  
23 this and consider changing the title of the study as the ASBMR has determined that  
24 atypical femur fracture definition requires radiographic confirmation. Therefore the  
25 title of this study should likely be "subtrochanteric and diaphyseal fractures" rather  
26 than "atypical femoral fractures" as the authors were not able to radiologically  
27 confirm the fractures. This is an important distinction as prior studies have shown  
28 significant misclassification of these fractures based on diagnostic coding alone.  
29

30 We absolutely agree with this comment and the title will be changed according to  
31 the reviewer's suggestion.  
32

33 In regards to the study design, many prior papers have addressed ever/never use  
34 of bisphosphonates and associations with atypical femur fracture. Duration of  
35 bisphosphonate and its association with atypical femur fracture is currently the area  
36 of interest in the literature-- the authors therefore appropriately address duration in  
37 their study design. However, it is unclear why there were two definitions of  
38 treatment length; it would be helpful if this was explained further or potentially only  
39 use "cumulative duration of actual treatment" as this is likely the definition of most  
40 interest.  
41

42 We assessed duration of bisphosphonate use in two different ways. First, as the  
43 cumulative use of bisphosphonates since the first prescription and, second, as the  
44 time since the first prescription. The idea behind this choice was to capture two  
45 different aspects of bisphosphonate use: the total use and the total time that the  
46 bone has been exposed to bisphosphonates. As we explain in the manuscript  
47 discussion, pathophysiological reasons support both measures. Therefore, we prefer  
48 to report both. Nonetheless, the methods section clarifies the definitions of  
49 cumulative exposure, which now reads as follows:  
50

51 In order to assess the effects of treatment length on the outcomes four  
52 different subgroups were considered based on cumulative duration of actual  
53 treatment, namely 30 days or less; >30 days to  $\leq 1$  year; >1 to  $\leq 3$  years  
54 and over 3 years. The effects of time of bisphosphonate exposure on  
55 atypical hip fracture risk were also analyzed. Exposure was measured as the  
56 time (in days) since the first prescription.  
57

58 These changes were also included in table 2.  
59  
60

1  
2  
3  
4 It would be helpful for the authors to go into further detail of how bisphosphonate  
5 use was defined - for example, was there a minimum exposure, such as 30 days,  
6 required before labeling the patient as a bisphosphonate user?  
7

8 A patient was categorized as bisphosphonate user if she had any prescription for  
9 bisphosphonates (no minimum duration was required), though a majority of users  
10 had prescriptions for more than 30 days (see table 2 in the manuscript). Oral  
11 bisphosphonate presentations in Spain provide medication for 28 days. We have  
12 clarified this issue in the methods section of the manuscript:  
13

14       Individuals were classified as ever vs never users. Ever users were those  
15       with at least one prescription, with no minimum duration.  
16

17 Lastly, a cohort design is likely a stronger method to address duration of use, and  
18 this may be something that the authors could consider.  
19

20 We agree with the reviewer that cohorts are in general a better study design than  
21 case-control studies, because they are less likely to suffer from recall bias,  
22 differential misclassification of exposure, and selection bias due to inappropriate  
23 selection of controls. However, our case-control study does not have those  
24 problems since cases and controls were nested in a well-defined dynamic cohort,  
25 removing the risk of selection bias, and information on treatments and  
26 comorbidities was collected before the outcome occurred, reducing the threat of  
27 differential misclassification of the exposure. In fact, conducting a case-control  
28 study instead of a cohort study is a more efficient use of resources since the same  
29 results are obtained with a much smaller sample size. Duration of use was defined  
30 in the same way that it would have been defined in a cohort study, that is, the time  
31 using bisphosphonate before having a hip fracture before a woman had the event,  
32 or the equivalent time for a woman without a fracture. We have added a short  
33 paragraph to the discussion highlighting this issue:  
34

35       Finally, our study had a case-control design and not a cohort design, which  
36       is supposed to be a stronger method. However, our cases and controls were  
37       selected from a well-defined cohort, reducing the possibility of selection  
38       bias, and information on treatment use and comorbidities was recorded  
39       before hip fractures occurred, making differential misclassification of the  
40       exposure less likely.  
41

42 In regards to the statistical methods, it was unclear what methods were used  
43 particularly when performing trend and this could be more clearly discussed. In  
44 addition, while all the covariates used in the multivariable model are important and  
45 associated with fracture, considering the number of covariates and the small  
46 sample size this could lead to overadjustment.  
47

48 Linear trends were calculated assigning the median value to each category, and  
49 including that value as a continuous variable in all models. This approach takes into  
50 account the distribution of the variable within each category and prevents outliers  
51 having a large impact in our estimates. This has been clarified in the methods  
52 section:  
53

54       Treatment duration was assessed as well and results were tested to identify  
55       a trend. Tests for trend were performed assigning the median to each  
56       category of ordinal variables, and including that value as a continuous  
57       variable in the models.  
58  
59  
60

1  
2  
3  
4  
5 Regarding the multivariable adjustment, we decided to adjust for all possible  
6 confounders in spite of the limited sample size to avoid residual confounding in the  
7 estimates as much as possible. Notably, results from model 1 (minimally adjusted)  
8 and model 2 (multivariable) were qualitatively similar, showing increased risk of  
9 atypical fractures with increased duration use. Therefore, 'overadjustment' is  
10 unlikely to be responsible for our study results. Nonetheless, we recognize this is a  
11 limitation, leading to imprecise estimates with wide confidence intervals, and the  
12 revised version states it clearly. We have included the following sentence in the  
13 discussion:

14  
15 One of the main limitations of this study is the small number of cases, which  
16 made it unfeasible to perform subgroup or individual drugs analyses, and led  
17 to wide confidence intervals in the estimates of association.  
18

19  
20 Would benefit from editing prior to publication for ease of reading.

21  
22 OK.

23  
24 Two recent papers, Meier RP et al, Arch Int Med, 2012 and Dell RM, JBMR, 2012 are  
25 important recent contributions to this field using radiographic confirmation of  
26 atypical femur fracture, and should likely be discussed in the setting of this study.  
27 It would be helpful if the authors addressed what niche their study fills in the  
28 current literature of atypical femur fracture.

29  
30 OK. Thank you for the contribution. The main niche of this study is the effects of  
31 bisphosphonates in a low fracture risk population. Please see the tracked new  
32 version of the manuscript

33  
34 While the main research question addressed, ie the association of ever use of  
35 bisphosphonates and atypical femur fractures, is clear from the conclusions, the  
36 conclusions made from the results with duration of use are less clear. The  
37 multivariate analysis with this small number of cases may not be the most accurate  
38 way to present the data, as it is unclear if this data is overadjusted. In addition, it  
39 is unclear if a strong conclusion can be made from this trend test using these small  
40 number of cases.

41  
42 We agree with the reviewer that the reduced number of cases limits the ability to  
43 make strong inferences for these results. This uncertainty is reflected by the wide  
44 confidence intervals in our estimates of association for the duration of use analyses.  
45 However, there are two reasons why we think these results are valuable. First, the  
46 trend analysis, which is more powerful to detect linear associations than the  
47 categorical analysis, showed highly significant associations between duration of use  
48 and risk of atypical fracture. Second, results from model 1 (minimally adjusted) and  
49 model 2 (multivariable) were qualitatively quite similar, i.e. both showed higher risk  
50 of fracture with increased duration of use. Differences in the magnitude of the  
51 association between models 1 and 2 are most likely due to the limited number of  
52 cases and, therefore, should be evaluated with caution. We believe that presenting  
53 multivariable adjusted models is necessary to demonstrate that confounding is not  
54 the main reason responsible for this association. To highlight the uncertainty of our  
55 results, though, we have including the following sentences in the discussion:

56  
57 One of the main limitations of this study is the small number of cases, which  
58 made it unfeasible to perform subgroup or individual drugs analyses, and led  
59 to wide confidence intervals in the estimates of association.  
60

1  
2  
3  
4  
5  
6  
7  
8  
9  
10  
11  
12  
13  
14  
15  
16  
17  
18  
19  
20  
21  
22  
23  
24  
25  
26  
27  
28  
29  
30  
31  
32  
33  
34  
35  
36  
37  
38  
39  
40  
41  
42  
43  
44  
45  
46  
47  
48  
49  
50  
51  
52  
53  
54  
55  
56  
57  
58  
59  
60

It would be helpful in the conclusion to discuss some of the more recent studies suggested above that have addressed the issue of duration and discuss this paper in their context.

OK. Please see the tracked new version of the manuscript.

For peer review only



**ORAL BISPHOSPHONATES ARE ASSOCIATED WITH  
INCREASED RISK OF ATYPICAL FEMORAL FRACTURES IN  
ELDERLY WOMEN**

|                                 |                                                                                                                                                                                                                                                                                                                                                                                                                                                                                                                                                                                                                                                                                                                                    |
|---------------------------------|------------------------------------------------------------------------------------------------------------------------------------------------------------------------------------------------------------------------------------------------------------------------------------------------------------------------------------------------------------------------------------------------------------------------------------------------------------------------------------------------------------------------------------------------------------------------------------------------------------------------------------------------------------------------------------------------------------------------------------|
| Journal:                        | <i>BMJ Open</i>                                                                                                                                                                                                                                                                                                                                                                                                                                                                                                                                                                                                                                                                                                                    |
| Manuscript ID:                  | bmjopen-2012-002091.R2                                                                                                                                                                                                                                                                                                                                                                                                                                                                                                                                                                                                                                                                                                             |
| Article Type:                   | Research                                                                                                                                                                                                                                                                                                                                                                                                                                                                                                                                                                                                                                                                                                                           |
| Date Submitted by the Author:   | 21-Dec-2012                                                                                                                                                                                                                                                                                                                                                                                                                                                                                                                                                                                                                                                                                                                        |
| Complete List of Authors:       | Erviti, Juan; Navarre Health Service, Drug Information Unit<br>Alonso, Alvaro; University of Minnesota, School of Public Health<br>Oliva, Belén; Spanish Agency for Medicines and Medical Devices, BIFAP Research Unit<br>Gorricho, Javier; Navarre Health Service, Drug Information Unit<br>López, Antonio; Navarre Health Service, Drug Information Unit<br>Timoner, Julia; Spanish Agency for Medicines and Medical Devices, BIFAP Research Unit<br>Huerta, Consuelo; Spanish Agency for Medicines and Medical Devices, BIFAP Research Unit<br>Gil, Miguel; Spanish Agency for Medicines and Medical Devices, BIFAP Research Unit<br>De Abajo, Francisco; Spanish Agency for Medicines and Medical Devices, BIFAP Research Unit |
| <b>Primary Subject Heading</b>: | Pharmacology and therapeutics                                                                                                                                                                                                                                                                                                                                                                                                                                                                                                                                                                                                                                                                                                      |
| Secondary Subject Heading:      | Epidemiology, Geriatric medicine                                                                                                                                                                                                                                                                                                                                                                                                                                                                                                                                                                                                                                                                                                   |
| Keywords:                       | CLINICAL PHARMACOLOGY, EPIDEMIOLOGY, PRIMARY CARE                                                                                                                                                                                                                                                                                                                                                                                                                                                                                                                                                                                                                                                                                  |
|                                 |                                                                                                                                                                                                                                                                                                                                                                                                                                                                                                                                                                                                                                                                                                                                    |

SCHOLARONE™  
Manuscripts

## TITLE

### ORAL BISPHOSPHONATES ARE ASSOCIATED WITH INCREASED RISK OF SUBTROCHANTERIC AND DIAPHYSEAL FRACTURES IN ELDERLY WOMEN

Juan Erviti<sup>1</sup>, Álvaro Alonso<sup>2,3</sup>, Belén Oliva<sup>4</sup>, Javier Gorricho<sup>1</sup>, Antonio López<sup>1</sup>, Julia Timoner<sup>4</sup>, Consuelo Huerta<sup>4</sup>, Miguel Gil<sup>4</sup> and Francisco De Abajo<sup>4,5</sup>.

<sup>1</sup>Drug Prescribing Unit, Navarre Health Service, Pamplona, Navarre, Spain; <sup>2</sup>School of Public Health, University of Minnesota, Minneapolis, Minnesota, United States; <sup>3</sup>School of Medicine, University of Navarre, Pamplona, Navarre, Spain; <sup>4</sup>BIFAP Research Unit, Division of Pharmacoepidemiology and Pharmacovigilance, Spanish Agency for Medicines and Medical Devices, Madrid, Spain; and <sup>5</sup>Clinical Pharmacology Unit, University Hospital "Príncipe de Asturias", Department of Pharmacology, University of Alcalá, Madrid, Spain.

## ARTICLE SUMMARY

### Article Focus

. The hypothesis of this study is that oral bisphosphonates may increase atypical femoral fracture risk in elderly women in the long-term use.

### Key messages

. Bisphosphonate use was associated with an increased risk of atypical femoral fractures in elderly women

. A higher risk among long-term bisphosphonate users was observed.

### Strengths and limitations

. The main strength is that the observed odds ratios indicate a strong association between bisphosphonate use and increased atypical femoral fracture risk that can hardly be challenged on grounds of bias in the design.

. One of the main limitations of this study is the small number of cases, which made it unfeasible to perform subgroup or individual drugs analyses. X-ray images were not available. However this may not be a relevant limitation yet hip fracture cases are described in detail in the surgical procedures.

## ABSTRACT

**Background:** Case reports and a few epidemiological studies have shown an increased risk of atypical femoral fractures associated with bisphosphonate use. The evidence is, however, scarce and more formal studies are needed.

**Objectives:** To evaluate the association between bisphosphonate use and risk of atypical femoral fractures among women aged 65 or older.

## Methods:

*Design.* Nested case-control study

*Setting.* The study was performed in a general practice research database in Spain.

*Exposures.* Use of oral bisphosphonates any time before the occurrence of atypical fractures among cases or the corresponding index date among controls. Bisphosphonate use was categorized as ever vs never users. Ever users were divided according to the total time since first prescription.

*Main outcome measures.* Cases were defined as women aged 65 years or older with a first diagnosis of atypical femoral fracture (subtrochanteric or diaphyseal), recorded in the BIFAP database between 01/01/2005 and 31/12/2008, and with at least one year of follow-up before the index date. All cases were validated. For each case, 5 age- and calendar year-matched controls without history of hip or atypical fracture were randomly selected from the database.

*Statistical analysis.* OR and 95%CI of atypical femoral fracture by bisphosphonate use were determined using conditional logistic regression. Models were adjusted for comorbidities and use of other medications

**Results:** The analysis included 44 cases and 220 matched controls (mean age, 82 years). Ever use of bisphosphonates was more frequent in cases than controls (29.6% vs 10.5%). In multivariate analyses, OR (95%CI) of atypical femoral fracture was 4.30 (1.55-11.9) in ever vs never users of bisphosphonates. The risk increased with long-term use, with an OR of 9.46 (2.17-41.3) comparing those using bisphosphonates over 3 years vs no users (p for trend=0.01).

**Conclusions:** Bisphosphonate use was associated with an increased risk of subtrochanteric or diaphyseal fractures in elderly women in a low fracture risk population, with a higher risk among long-term bisphosphonate users.

## INTRODUCTION

### Background

In 2005, *Odvina* et al published the first paper warning about the potentially harmful effects of alendronate due to suppression of bone remodelling.<sup>1</sup> Spontaneous fractures were observed in 9 patients receiving long-term treatment with the drug (between 3-8 years). It was hypothesized that bisphosphonate long-term use might increase the risk of fracture and cause difficulties in repairing fractures in some patients.

Then more cases and short series of cases were described.<sup>2-11</sup> During 2009 a case-control study was carried out to evaluate the association between low impact femur fractures and the long-term use of bisphosphonates.<sup>12</sup> A comparison was made between 41 subtrochanteric or diaphyseal fractures with 82 control patients with femoral or inter-trochanteric fractures. A strong association was found between the use of bisphosphonates and atypical fractures. At the same time, a typical radiological pattern was described for the fractures related to bisphosphonates. During the same year more cases and series of cases of femur fractures associated with the use of bisphosphonates were published.<sup>13-16</sup> The capacity of bisphosphonates to weaken bone structure is reflected in an article that describes a series of seven cases of bilateral fractures or sequential cases of low impact fractures all associated with the treatment with alendronate for at least five years.<sup>17</sup> These included one patient with simultaneous bilateral femur fractures affecting the diaphysis, two patients with sequential subtrochanteric fractures and four patients



1  
2  
3 in whom a contralateral subtrochanteric fracture was discovered after diagnosing  
4 the initial fracture.

5  
6 Finally, in two cohort analyses bisphosphonate use was associated with a much  
7 higher relative risk of atypical fractures<sup>18,19</sup> (17 and 47-fold higher, respectively)  
8 while a recent case-control study showed a 3-fold increase in bisphosphonate  
9 users.<sup>20</sup> More studies in different populations with sufficient sample size are needed  
10 in order to shed more light on the use of bisphosphonates and atypical fracture  
11 risk.

## 12 13 14 15 **Objective**

16  
17 The aim of this study is to evaluate the association between use of bisphosphonates  
18 and risk of subtrochanteric or diaphyseal fractures among women aged 65 years or  
19 older in a Mediterranean population. We hypothesized that oral bisphosphonates  
20 could increase subtrochanteric or diaphyseal fracture risk.

## 21 22 23 **METHODS**

### 24 25 **Study design and setting**

26  
27 We carried out a case-control study nested in the Spanish database BIFAP (*Base de*  
28 *Datos para la Investigación Farmacoepidemiológica en Atención Primaria*, Database  
29 for Pharmacoepidemiologic Research in Primary Care). This is a longitudinal  
30 population-based database maintained by the Spanish Agency for Medicines and  
31 Medical Devices that collects, from 2001 onwards, the computerized medical  
32 records of >3.2 million patients attended by more than 1,800 primary care  
33 physicians throughout Spain. It includes anonymized information on >13.7 million  
34 person-years of follow up.<sup>21,22</sup> This project was approved by the Navarre Research  
35 Ethics Board, Pamplona, Spain.

### 36 37 38 **Participants**

39  
40 Cases were defined as women aged 65 years or older with a first diagnosis of  
41 subtrochanteric or diaphyseal fracture, recorded between 01/01/2005 and  
42 31/12/2008, and with at least 1 year of follow-up in BIFAP before the event date.  
43 Pre-selected cases for hip fracture were identified by both ICPC-2 codes and free  
44 text searching. All clinical records of the potential cases were manually reviewed by  
45 the BIFAP team blinded to the exposure status. The date of hospitalization served  
46 as the index date. We excluded women with any history of cancer, Paget disease,  
47 prevalent hip fracture and fractures resulting from trauma or motor vehicle  
48 collisions. For each case, 5 controls with no history of hip fracture at the time of the  
49 index date of their corresponding case were selected, matched by same age and  
50 calendar year of enrolment in BIFAP.

### 51 52 53 **Medication use and other covariates**

54  
55 Use of bisphosphonates before the index date was obtained from the computerized  
56 database. Duration of bisphosphonate exposure was evaluated by examining  
57 prescriptions for oral alendronate, risedronate, ibandronate or etidronate from the  
58  
59  
60

1  
2  
3 beginning of therapy to the index date or the corresponding date among controls  
4 (ATC codes: alendronate, M05BA04; alendronate plus vitamin D, M05BB;  
5 risedronate, M05BA07 and ibandronate, M05BA06).  
6

7 Individuals were classified as ever vs never users. Ever users were those with at  
8 least one prescription, with no minimum duration. Ever users were also divided into  
9 *current users* (if most recent prescription lasted through index date or ended in the  
10 month before it), *recent users* (if most recent prescription ended between 1 and 6  
11 months before index date) and *past users* (if most recent prescription ended more  
12 than 6 months before index date).  
13

14 In order to assess the effects of treatment length on the outcomes four different  
15 subgroups were considered based on cumulative duration of actual treatment,  
16 namely 30 days or less; >30 days to ≤1 year; >1 to ≤3 years and over 3 years. The  
17 effects of time of bisphosphonate exposure on atypical hip fracture risk were also  
18 analyzed. Exposure was measured as the time (in days) since the first prescription.  
19

20 Information on comorbidities (ICPC-2 codes) and use of other medications (ATC  
21 codes) was obtained. Cumulative total days of treatment was calculated for each  
22 individual drug. Time between last prescription and index date was also calculated.  
23 Other variables such as weight (kg), height (cm), body mass index (kg/m<sup>2</sup>) and  
24 smoking status (yes/no/past smoker) were obtained as well.  
25

## 26 27 **Statistical methods**

28  
29 We used conditional logistic regression to estimate the odds ratios (ORs) and 95  
30 percent confidence intervals (CIs) for the association between bisphosphonate  
31 exposure (ever vs. never) and hip fractures. Treatment duration was assessed as  
32 well and results were tested to identify a trend. Tests for trend were performed  
33 assigning the median to each category of ordinal variables, and including that value  
34 as a continuous variable in the models. The level of significance was established at p  
35 = 0.05.  
36

37 An initial model adjusted only for matching variables. A second model adjusted  
38 additionally for smoking, BMI, alcoholism, previous fracture, kidney disease,  
39 malabsorption, stroke, dementia, rheumatoid arthritis, diabetes, epilepsy,  
40 Parkinson disease, thyroid disease, and use of PPI (no use, ≤1 yr, >1 yr),  
41 anxiolytics, sedatives, antidepressants, antihypertensives, corticosteroids (no use,  
42 ≤1 yr, >1 yr), raloxifene, hormone replacement therapy, and thiazolidinediones.  
43  
44  
45  
46

## 47 **RESULTS**

48  
49 Between 2005 and 2008, 45 atypical fractures (31 subtrochanteric and 14 shaft  
50 fractures) were observed. The average age of cases was 82.2 ± 6.7 years. Previous  
51 fractures and drug use was more prevalent in cases than in controls (table 1).  
52  
53

54 Ever use of bisphosphonates was more frequent in cases than in controls, 13  
55 (29.6%) vs 23 (10.5%) yielding to an adjusted OR = 4.30 (95%CI, 1.55-11.9).  
56 Within ever users no apparent difference was observed between current, recent or  
57 past users, although numbers were quite small. A duration-dependent association  
58  
59  
60

1  
2  
3 was suggested, with higher risk among those with longer exposure to  
4 bisphosphonates (> 3 years, OR = 9.46 (95%CI, 2.17-41.3) (table 2). The results  
5 by individual drugs are not shown because of insufficient sample size.  
6  
7  
8  
9

## 10 DISCUSSION

### 13 **Key results**

14  
15 Our findings show an increase of atypical fracture risk among *ever users* of  
16 bisphosphonates vs *never users*, and a distinct duration-response association, with  
17 higher risk among women using bisphosphonates for longer time period. Results did  
18 not vary for bisphosphonate use timing (current use, recent use, past use). Since  
19 these drugs accumulate in the bone and remain there for years this grading system  
20 may not make any relevant difference, being more important the overall cumulative  
21 exposure expressed as time in days since the first prescription. Both unadjusted and  
22 adjusted data show a duration-dependent association between bisphosphonate use  
23 and higher risk of atypical fractures.  
24

25 Both cohort and case-control studies show an increased risk of atypical fractures  
26 associated with bisphosphonate use. One peculiarity about our study is that it was  
27 carried out in a Mediterranean population, with a lower risk for bone fractures  
28 compared to Anglo-Saxon or Northern European countries. It could be hypothesized  
29 that, because of the lower risk of fractures in the Spanish population, the  
30 association between bisphosphonates and subtrochanteric or diaphyseal fractures  
31 might not be evident. However our results are similar to those obtained in the  
32 largest case-control study published so far<sup>20</sup> and show an overall 4-fold higher risk.  
33 In this study an association between long-term use and higher risk was also  
34 observed. In two cohort studies overall fracture risk observed was much higher.<sup>18,19</sup>  
35 A recent study also found a higher atypical femoral fracture risk associated with  
36 bisphosphonate use when classic fractures are used as controls. In this study longer  
37 duration of treatment resulted in augmented risk.<sup>23</sup> Another cohort study with a  
38 follow-up period of 10 years also found that the incidence of atypical fractures  
39 increases with longer duration of bisphosphonate use.<sup>24</sup>  
40

41 Bisphosphonates induce apoptosis of the osteoclasts and inhibit bone resorption.  
42 However, during the normal process of bone remodeling the formation of bone  
43 produced by osteoblasts is induced by osteoclasts, which implies that on reducing  
44 the resorptive activity, there is also an accompanying reduction in bone formation.  
45 The greater bone density observed after treatment with bisphosphonates may thus  
46 reflect bone weakness and not strength given the increase of mineral content in the  
47 bone. Bisphosphonates also weaken the collagen structure and produce an  
48 accumulation of microscopic injuries in bone structure. Biologically, this makes it  
49 plausible that long-term bisphosphonate use would increase the risk of fracture and  
50 cause difficulty in repairing fractures.  
51

52  
53 Deleterious effects on bone structure have been observed with both  
54 bisphosphonates and denosumab but not with other drugs used for osteoporosis.  
55 Both type of drugs inhibit the activity of osteoclasts and thereby bone resorption.  
56 Since osteoblastic bone formation follows osteoclastic resorption during normal  
57 bone remodelling, the inhibition of resorption is accompanied by a decrease in bone  
58 formation. In other words, bone strength may be weaker as normal turnover is  
59  
60

1  
2  
3 inhibited. Furthermore bisphosphonates prolong secondary mineralization leading to  
4 increased BMD but decreased bone strength due to a higher mineral content (brittle  
5 bones).

6  
7 A typical radiological pattern was described for the fractures related to  
8 bisphosphonates and a high association between the use of bisphosphonates and  
9 the appearance of this radiological pattern.<sup>25</sup> Also Koh et al determined that  
10 atypical lesions are more frequent in femur regions of maximal tension loading.<sup>26</sup>  
11 Thereby there is biological, radiological and mechanical rationale for an increase in  
12 atypical fracture risk associated with the use of bisphosphonates.

### 13 14 **Limitations**

15  
16 One of the main limitations of this study is the small number of cases, which made  
17 it unfeasible to perform subgroup or individual drugs analyses, and led to wide  
18 confidence intervals in the estimates of association.. Also we relied on prescription  
19 data to determine exposure status and duration of bisphosphonate exposure. It is  
20 sensible to think that real exposure will surely be lower than registered to some  
21 extent. However, this will most probably represent a non-differential  
22 misclassification that would distort the result towards the null value. Therefore,  
23 given that our findings show an increase in atypical fracture risk associated with  
24 bisphosphonate use we may assume that it represents a conservative estimate.

25  
26 Bone mineral density determination is not a standard test available in the public  
27 health system in Spain. Thereby information on bone density in clinical records was  
28 rather scarce. In any case, this test has a very poor fracture risk predictive value  
29 and its clinical relevance can be challenged. In the present analysis, we adjusted for  
30 other bone-related variables. One of these prevalence of previous fractures might  
31 confound the association between bisphosphonate use and risk of fracture. In order  
32 to minimize confounding by indication bias, results were adjusted for previous  
33 fractures, comorbidities and use of other medications.

34  
35 Finally, our study had a case-control design and not a cohort design, which is  
36 supposed to be a stronger method. However, our cases and controls were selected  
37 from a well-defined cohort, reducing the possibility of selection bias, and  
38 information on treatment use and comorbidities was recorded before hip fractures  
39 occurred, making differential misclassification of the exposure less likely.

### 40 41 42 **CONCLUSION**

43  
44 Bisphosphonate use was associated with an increased risk of subtrochanteric or  
45 diaphyseal fractures in elderly women in a low fracture risk population, with a  
46 higher risk among long-term bisphosphonate users.

### 47 48 49 **Acknowledgements**

50  
51 The authors would like to thank the collaboration of general practitioners  
52 contributing to BIFAP.

### 53 54 55 **Funding**

This study received a grant by the Spanish Ministry of Health, SAS/2481/2009 (TRA-071)

## References

- <sup>1</sup> Odvina CV, Zerwekh JE, Rao DS, Maalouf N, Gottschalk FS and Pak CYC. Severely suppressed bone turnover: a potential complication of alendronate therapy. *J Clin Endocrinol Metab* 2005;90:1294-1301.
- <sup>2</sup> Schneider JP. Should bisphosphonates be continued indefinitely? An unusual fracture in a healthy woman on long-term alendronate. *Geriatrics* 2006; 61(1)31-33.
- <sup>3</sup> Cheung R, Leung KK, Lee KC and Chow TC. Sequential non-traumatic femoral shaft fractures in a patient on long-term alendronate. *Hong Kong Med J* 2007;13(6):485-9.
- <sup>4</sup> Lee P, van der Wall H, and Seibel MJ. Looking beyond low bone mineral density: multiple insufficiency fractures in a woman with post-menopausal osteoporosis on alendronate therapy. *J Endocrinol Invest* 2007;30:590-97.
- <sup>5</sup> Goh SK, Yang KY, Koh JSB, Wong MK, Chua SY, Chua DTC and Howe TS. Subtrochanteric insufficiency fractures in patients on alendronate therapy. A caution. *J Bone Joint Surg (Br)* 2007;89-B:349-53.
- <sup>6</sup> Sayed-Noor AS and Sjöden GO. Subtrochanteric displaced insufficiency fracture after long-term alendronate therapy – a case report. *Acta Orthopædica* 2008;79(4):565-567
- <sup>7</sup> Visekruna M, Wilson D, and McKiernan FE. Severely suppressed bone turnover and atypical skeletal fragility. *J Clin Endocrinol Metabol* 2008;93(8):2948-2952.
- <sup>8</sup> Kwek EBK, Koh JSB and Howe TS. More on atypical fractures of the femoral diaphysis (letter). *N Engl J Med* 2008;359(3):316-318.
- <sup>9</sup> Lenart BA, Lorich DG, and Lane JM. Atypical fractures of the femoral diaphysis in postmenopausal women taking alendronate (letter). *N Engl J Med* 2008;358(12):1304-1306.
- <sup>10</sup> Kwek EBK, Goh SK, Koh JSB Png MA and Howe TS. An emerging pattern of subtrochanteric stress fractures: a long-term complication of alendronate therapy? *Injury* 2008;39:224-31.
- <sup>11</sup> Neviaser AS, Lane JM, Lenart BA, Edobor-Osula F, and Lorich DG. Low-energy femoral shaft fractures associated with alendronate use. *J Orthop Trauma* 2008;22(5):346-350.
- <sup>12</sup> Lenart BA, Neviaser AS, Lyman S, Chang CC, Edobor-Osula F, Steele B et al. Association of low-energy femoral fractures with prolonged bisphosphonate use: a case control study. *Osteoporos Int* 2009;20:1353-1362.
- <sup>13</sup> Sabed-Noor AS, and Sjöden GO. Two femoral insufficiency fractures after long-term alendronate therapy. *Clin Orthop Relat Res* 2009;467:1921-6.
- <sup>14</sup> Ing-Lorenzini K, Desmeules J, Plachta O, Suva D, Dayer P, and Peter R. Low-energy femoral fractures associated with the long-term use of bisphosphonates. A case series from a Swiss University Hospital. *Drug Safety* 2009;32(9):775-785.
- <sup>15</sup> Goddard MS, Kristoff RR, Johnston JC, and Khanuja HS. A traumatic bilateral femur fracture in long-term bisphosphonate use. *Orthopedics* 2009;32:607.
- <sup>16</sup> Odvina CV, Levy S, Rao S, Zerwekh JE, and Rao S. Unusual mid-shaft fractures during long term bisphosphonate therapy. *Clin Endocrinol (Oxf)*, doi: 10.1111/j.1365-2265.2009.03581.x
- <sup>17</sup> Capeci CM and Tejawani NC. Bilateral low-energy simultaneous or sequential femoral fractures in patients on long-term alendronate therapy. *J Bone Joint Surg Am* 2009;91:2556-61
- <sup>18</sup> Giusti A, Hamdy NA, Dekkers OM, Ramautar SR, Dijkstra S, Papapoulos SE. Atypical fractures and bisphosphonate therapy: a cohort study of patients with femoral fracture with radiographic adjudication of fracture site and features. *Bone*. 2011;48(5):966-71.
- <sup>19</sup> Schilcher J, Michaëlsson K, Aspenberg P. Bisphosphonate use and atypical fractures of the femoral shaft. *N Engl J Med*. 2011;364(18):1728-37.
- <sup>20</sup> Park-Wyllie LY, Mamdani MM, Juurlink DN, Hawker GA, Gunraj N, Austin PC, et al. Bisphosphonate use and the risk of subtrochanteric or femoral shaft fractures in older women. *JAMA* 2011;305(8):783-9.
- <sup>21</sup> Salvador Rosa J.C, Moreno Pérez D, Sonego García Rodríguez LA, de Abajo Iglesias FJ. El Proyecto BIFAP: Base de datos para la Investigación. *Aten Primaria* 2002; 30: 655-661.
- <sup>22</sup> Agencia Española de Medicamentos y Productos Sanitarios. Proyecto BIFAP <http://www.bifap.org/summary.php>
- <sup>23</sup> Meier RPH, Perneger TV, Stern R, Rizzoli R, Peter RE. Increasing occurrence of atypical femoral fractures associated with bisphosphonate use. *Arch Intern Med* 2012;172(12):930-936.

1  
2  
3  
4  
5  
6  
7  
8  
9  
10  
11  
12  
13  
14  
15  
16  
17  
18  
19  
20  
21  
22  
23  
24  
25  
26  
27  
28  
29  
30  
31  
32  
33  
34  
35  
36  
37  
38  
39  
40  
41  
42  
43  
44  
45  
46  
47  
48  
49  
50  
51  
52  
53  
54  
55  
56  
57  
58  
59  
60

<sup>24</sup> Dell RM, Adams AL, Greene DF, Funahashi TT, Silverman SL, Eisemon EO, et al Incidence of Atypical Nontraumatic Diaphyseal Fractures of the Femur. *JBMR* 2012;27(12):2544-2550.

<sup>25</sup> Lenart BA, Neviasser AS, Lyman S, Chang CC, Edobor-Osula F, Steele B et al. Association of low-energy femoral fractures with prolonged bisphosphonate use: a case control study. *Osteoporos Int* 2009; 20:1353-1362.

<sup>26</sup> Koh JSB, Goh SK, Png MA, Ng ACM, Howe TS. Distribution of atypical fractures and cortical stress lesions in the femur: implications on pathophysiology. *Singapore Med J* 2011;52(2):77-80

## TITLE

### ORAL BISPHOSPHONATES ARE ASSOCIATED WITH INCREASED RISK OF SUBTROCHANTERIC AND DIAPHYSEAL FRACTURES IN ELDERLY WOMEN

Juan Erviti<sup>1</sup>, Álvaro Alonso<sup>2,3</sup>, Belén Oliva<sup>4</sup>, Javier Gorricho<sup>1</sup>, Antonio López<sup>1</sup>, Julia Timoner<sup>4</sup>, Consuelo Huerta<sup>4</sup>, Miguel Gil<sup>4</sup> and Francisco De Abajo<sup>4,5</sup>.

<sup>1</sup>Drug Prescribing Unit, Navarre Health Service, Pamplona, Navarre, Spain; <sup>2</sup>School of Public Health, University of Minnesota, Minneapolis, Minnesota, United States; <sup>3</sup>School of Medicine, University of Navarre, Pamplona, Navarre, Spain; <sup>4</sup>BIFAP Research Unit, Division of Pharmacoepidemiology and Pharmacovigilance, Spanish Agency for Medicines and Medical Devices, Madrid, Spain; and <sup>5</sup>Clinical Pharmacology Unit, University Hospital "Príncipe de Asturias", Department of Pharmacology, University of Alcalá, Madrid, Spain.

## ARTICLE SUMMARY

### Article Focus

. The hypothesis of this study is that oral bisphosphonates may increase atypical femoral fracture risk in elderly women in the long-term use.

### Key messages

. Bisphosphonate use was associated with an increased risk of atypical femoral fractures in elderly women

. A higher risk among long-term bisphosphonate users was observed.

### Strengths and limitations

. The main strength is that the observed odds ratios indicate a strong association between bisphosphonate use and increased atypical femoral fracture risk that can hardly be challenged on grounds of bias in the design.

. One of the main limitations of this study is the small number of cases, which made it unfeasible to perform subgroup or individual drugs analyses. X-ray images were not available. However this may not be a relevant limitation yet hip fracture cases are described in detail in the surgical procedures.

## ABSTRACT

**Background:** Case reports and a few epidemiological studies have shown an increased risk of atypical femoral fractures associated with bisphosphonate use. The evidence is, however, scarce and more formal studies are needed.

**Objectives:** To evaluate the association between bisphosphonate use and risk of atypical femoral fractures among women aged 65 or older.



## Methods:

*Design.* Nested case-control study

*Setting.* The study was performed in a general practice research database in Spain.

*Exposures.* Use of oral bisphosphonates any time before the occurrence of atypical fractures among cases or the corresponding index date among controls. Bisphosphonate use was categorized as ever vs never users. Ever users were divided according to the total time since first prescription.

*Main outcome measures.* Cases were defined as women aged 65 years or older with a first diagnosis of atypical femoral fracture (subtrochanteric or diaphyseal), recorded in the BIFAP database between 01/01/2005 and 31/12/2008, and with at least one year of follow-up before the index date. All cases were validated. For each case, 5 age- and calendar year-matched controls without history of hip or atypical fracture were randomly selected from the database.

*Statistical analysis.* OR and 95%CI of atypical femoral fracture by bisphosphonate use were determined using conditional logistic regression. Models were adjusted for comorbidities and use of other medications

**Results:** The analysis included 44 cases and 220 matched controls (mean age, 82 years). Ever use of bisphosphonates was more frequent in cases than controls (29.6% vs 10.5%). In multivariate analyses, OR (95%CI) of atypical femoral fracture was 4.30 (1.55-11.9) in ever vs never users of bisphosphonates. The risk increased with long-term use, with an OR of 9.46 (2.17-41.3) comparing those using bisphosphonates over 3 years vs no users (p for trend=0.01).

**Conclusions:** Bisphosphonate use was associated with an increased risk of subtrochanteric or diaphyseal fractures in elderly women in a low fracture risk population, with a higher risk among long-term bisphosphonate users.

## INTRODUCTION

### Background

In 2005, *Odvina* et al published the first paper warning about the potentially harmful effects of alendronate due to suppression of bone remodelling.<sup>1</sup> Spontaneous fractures were observed in 9 patients receiving long-term treatment with the drug (between 3-8 years). It was hypothesized that bisphosphonate long-term use might increase the risk of fracture and cause difficulties in repairing fractures in some patients.

Then more cases and short series of cases were described.<sup>2-11</sup> During 2009 a case-control study was carried out to evaluate the association between low impact femur fractures and the long-term use of bisphosphonates.<sup>12</sup> A comparison was made between 41 subtrochanteric or diaphyseal fractures with 82 control patients with femoral or inter-trochanteric fractures. A strong association was found between the use of bisphosphonates and atypical fractures. At the same time, a typical radiological pattern was described for the fractures related to bisphosphonates. During the same year more cases and series of cases of femur fractures associated with the use of bisphosphonates were published.<sup>13-16</sup> The capacity of bisphosphonates to weaken bone structure is reflected in an article that describes a series of seven cases of bilateral fractures or sequential cases of low impact fractures all associated with the treatment with alendronate for at least five years.<sup>17</sup> These included one patient with simultaneous bilateral femur fractures affecting the diaphysis, two patients with sequential subtrochanteric fractures and four patients



1  
2  
3 in whom a contralateral subtrochanteric fracture was discovered after diagnosing  
4 the initial fracture.

5  
6 Finally, in two cohort analyses bisphosphonate use was associated with a much  
7 higher relative risk of atypical fractures<sup>18,19</sup> (17 and 47-fold higher, respectively)  
8 while a recent case-control study showed a 3-fold increase in bisphosphonate  
9 users.<sup>20</sup> More studies in different populations with sufficient sample size are needed  
10 in order to shed more light on the use of bisphosphonates and atypical fracture  
11 risk.

## 12 13 14 15 **Objective**

16  
17 The aim of this study is to evaluate the association between use of bisphosphonates  
18 and risk of subtrochanteric or diaphyseal fractures among women aged 65 years or  
19 older in a Mediterranean population. We hypothesized that oral bisphosphonates  
20 could increase subtrochanteric or diaphyseal fracture risk.

## 21 22 23 **METHODS**

### 24 25 **Study design and setting**

26  
27 We carried out a case-control study nested in the Spanish database BIFAP (*Base de*  
28 *Datos para la Investigación Farmacoepidemiológica en Atención Primaria*, Database  
29 for Pharmacoepidemiologic Research in Primary Care). This is a longitudinal  
30 population-based database maintained by the Spanish Agency for Medicines and  
31 Medical Devices that collects, from 2001 onwards, the computerized medical  
32 records of >3.2 million patients attended by more than 1,800 primary care  
33 physicians throughout Spain. It includes anonymized information on >13.7 million  
34 person-years of follow up.<sup>21,22</sup> This project was approved by the Navarre Research  
35 Ethics Board, Pamplona, Spain.

### 36 37 38 **Participants**

39  
40 Cases were defined as women aged 65 years or older with a first diagnosis of  
41 subtrochanteric or diaphyseal fracture, recorded between 01/01/2005 and  
42 31/12/2008, and with at least 1 year of follow-up in BIFAP before the event date.  
43 Pre-selected cases for hip fracture were identified by both ICPC-2 codes and free  
44 text searching. All clinical records of the potential cases were manually reviewed by  
45 the BIFAP team blinded to the exposure status. The date of hospitalization served  
46 as the index date. We excluded women with any history of cancer, Paget disease,  
47 prevalent hip fracture and fractures resulting from trauma or motor vehicle  
48 collisions. For each case, 5 controls with no history of hip fracture at the time of the  
49 index date of their corresponding case were selected, matched by same age and  
50 calendar year of enrolment in BIFAP.

### 51 52 53 **Medication use and other covariates**

54  
55 Use of bisphosphonates before the index date was obtained from the computerized  
56 database. Duration of bisphosphonate exposure was evaluated by examining  
57 prescriptions for oral alendronate, risedronate, ibandronate or etidronate from the  
58  
59  
60

1  
2  
3 beginning of therapy to the index date or the corresponding date among controls  
4 (ATC codes: alendronate, M05BA04; alendronate plus vitamin D, M05BB;  
5 risedronate, M05BA07 and ibandronate, M05BA06).  
6

7 Individuals were classified as ever vs never users. Ever users were those with at  
8 least one prescription, with no minimum duration. Ever users were also divided into  
9 *current users* (if most recent prescription lasted through index date or ended in the  
10 month before it), *recent users* (if most recent prescription ended between 1 and 6  
11 months before index date) and *past users* (if most recent prescription ended more  
12 than 6 months before index date).  
13

14 In order to assess the effects of treatment length on the outcomes four different  
15 subgroups were considered based on cumulative duration of actual treatment,  
16 namely 30 days or less; >30 days to ≤1 year; >1 to ≤3 years and over 3 years. The  
17 effects of time of bisphosphonate exposure on atypical hip fracture risk were also  
18 analyzed. Exposure was measured as the time (in days) since the first prescription.  
19

20 Information on comorbidities (ICPC-2 codes) and use of other medications (ATC  
21 codes) was obtained. Cumulative total days of treatment was calculated for each  
22 individual drug. Time between last prescription and index date was also calculated.  
23 Other variables such as weight (kg), height (cm), body mass index (kg/m<sup>2</sup>) and  
24 smoking status (yes/no/past smoker) were obtained as well.  
25

## 26 27 **Statistical methods**

28  
29 We used conditional logistic regression to estimate the odds ratios (ORs) and 95  
30 percent confidence intervals (CIs) for the association between bisphosphonate  
31 exposure (ever vs. never) and hip fractures. Treatment duration was assessed as  
32 well and results were tested to identify a trend. Tests for trend were performed  
33 assigning the median to each category of ordinal variables, and including that value  
34 as a continuous variable in the models. The level of significance was established at p  
35 = 0.05.  
36

37 An initial model adjusted only for matching variables. A second model adjusted  
38 additionally for smoking, BMI, alcoholism, previous fracture, kidney disease,  
39 malabsorption, stroke, dementia, rheumatoid arthritis, diabetes, epilepsy,  
40 Parkinson disease, thyroid disease, and use of PPI (no use, ≤1 yr, >1 yr),  
41 anxiolytics, sedatives, antidepressants, antihypertensives, corticosteroids (no use,  
42 ≤1 yr, >1 yr), raloxifene, hormone replacement therapy, and thiazolidinediones.  
43  
44  
45

## 46 47 **RESULTS**

48  
49 Between 2005 and 2008, 45 atypical fractures (31 subtrochanteric and 14 shaft  
50 fractures) were observed. The average age of cases was 82.2 ± 6.7 years. Previous  
51 fractures and drug use was more prevalent in cases than in controls (table 1).  
52  
53

54 Ever use of bisphosphonates was more frequent in cases than in controls, 13  
55 (29.6%) vs 23 (10.5%) yielding to an adjusted OR = 4.30 (95%CI, 1.55-11.9).  
56 Within ever users no apparent difference was observed between current, recent or  
57 past users, although numbers were quite small. A duration-dependent association  
58  
59  
60

1  
2  
3 was suggested, with higher risk among those with longer exposure to  
4 bisphosphonates (> 3 years, OR = 9.46 (95%CI, 2.17-41.3) (table 2). The results  
5 by individual drugs are not shown because of insufficient sample size.  
6  
7  
8  
9

## 10 DISCUSSION

### 13 **Key results**

14  
15 Our findings show an increase of atypical fracture risk among *ever users* of  
16 bisphosphonates vs *never users*, and a distinct duration-response association, with  
17 higher risk among women using bisphosphonates for longer time period. Results did  
18 not vary for bisphosphonate use timing (current use, recent use, past use). Since  
19 these drugs accumulate in the bone and remain there for years this grading system  
20 may not make any relevant difference, being more important the overall cumulative  
21 exposure expressed as time in days since the first prescription. Both unadjusted and  
22 adjusted data show a duration-dependent association between bisphosphonate use  
23 and higher risk of atypical fractures.  
24

25 Both cohort and case-control studies show an increased risk of atypical fractures  
26 associated with bisphosphonate use. One peculiarity about our study is that it was  
27 carried out in a Mediterranean population, with a lower risk for bone fractures  
28 compared to Anglo-Saxon or Northern European countries. It could be hypothesized  
29 that, because of the lower risk of fractures in the Spanish population, the  
30 association between bisphosphonates and subtrochanteric or diaphyseal fractures  
31 might not be evident. However Our results are similar to those obtained in the  
32 largest case-control study published so far<sup>20</sup> and show an overall 4-fold higher risk.  
33 In this study an association between long-term use and higher risk was also  
34 observed. In two cohort studies overall fracture risk observed was much higher.<sup>18,19</sup>  
35 A recent study also found a higher atypical femoral fracture risk associated with  
36 bisphosphonate use when classic fractures are used as controls. In this study longer  
37 duration of treatment resulted in augmented risk.<sup>23</sup> Another cohort study with a  
38 follow-up period of 10 years also found that the incidence of atypical fractures  
39 increases with longer duration of bisphosphonate use.<sup>24</sup>  
40

41 Bisphosphonates induce apoptosis of the osteoclasts and inhibit bone resorption.  
42 However, during the normal process of bone remodeling the formation of bone  
43 produced by osteoblasts is induced by osteoclasts, which implies that on reducing  
44 the resorptive activity, there is also an accompanying reduction in bone formation.  
45 The greater bone density observed after treatment with bisphosphonates may thus  
46 reflect bone weakness and not strength given the increase of mineral content in the  
47 bone. Bisphosphonates also weaken the collagen structure and produce an  
48 accumulation of microscopic injuries in bone structure. Biologically, this makes it  
49 plausible that long-term bisphosphonate use would increase the risk of fracture and  
50 cause difficulty in repairing fractures.  
51

52  
53 Deleterious effects on bone structure have been observed with both  
54 bisphosphonates and denosumab but not with other drugs used for osteoporosis.  
55 Both type of drugs inhibit the activity of osteoclasts and thereby bone resorption.  
56 Since osteoblastic bone formation follows osteoclastic resorption during normal  
57 bone remodelling, the inhibition of resorption is accompanied by a decrease in bone  
58 formation. In other words, bone strength may be weaker as normal turnover is  
59  
60

1  
2  
3 inhibited. Furthermore bisphosphonates prolong secondary mineralization leading to  
4 increased BMD but decreased bone strength due to a higher mineral content (brittle  
5 bones).

6  
7 A typical radiological pattern was described for the fractures related to  
8 bisphosphonates and a high association between the use of bisphosphonates and  
9 the appearance of this radiological pattern.<sup>25</sup> Also Koh et al determined that  
10 atypical lesions are more frequent in femur regions of maximal tension loading.<sup>26</sup>  
11 Thereby there is biological, radiological and mechanical rationale for an increase in  
12 atypical fracture risk associated with the use of bisphosphonates.

### 13 14 **Limitations**

15  
16 One of the main limitations of this study is the small number of cases, which made  
17 it unfeasible to perform subgroup or individual drugs analyses, and led to wide  
18 confidence intervals in the estimates of association.. Also we relied on prescription  
19 data to determine exposure status and duration of bisphosphonate exposure. It is  
20 sensible to think that real exposure will surely be lower than registered to some  
21 extent. However, this will most probably represent a non-differential  
22 misclassification that would distort the result towards the null value. Therefore,  
23 given that our findings show an increase in atypical fracture risk associated with  
24 bisphosphonate use we may assume that it represents a conservative estimate.

25  
26 Bone mineral density determination is not a standard test available in the public  
27 health system in Spain. Thereby information on bone density in clinical records was  
28 rather scarce. In any case, this test has a very poor fracture risk predictive value  
29 and its clinical relevance can be challenged. In the present analysis, we adjusted for  
30 other bone-related variables. One of these prevalence of previous fractures might  
31 confound the association between bisphosphonate use and risk of fracture. In order  
32 to minimize confounding by indication bias, results were adjusted for previous  
33 fractures, comorbidities and use of other medications.

34  
35 Finally, our study had a case-control design and not a cohort design, which is  
36 supposed to be a stronger method. However, our cases and controls were selected  
37 from a well-defined cohort, reducing the possibility of selection bias, and  
38 information on treatment use and comorbidities was recorded before hip fractures  
39 occurred, making differential misclassification of the exposure less likely.

### 40 41 42 **CONCLUSION**

43  
44 Bisphosphonate use was associated with an increased risk of subtrochanteric or  
45 diaphyseal fractures in elderly women in a low fracture risk population, with a  
46 higher risk among long-term bisphosphonate users.

### 47 48 49 **Acknowledgements**

50  
51 The authors would like to thank the collaboration of general practitioners  
52 contributing to BIFAP.

### 53 54 55 **Funding**

This study received a grant by the Spanish Ministry of Health, SAS/2481/2009 (TRA-071)

## References

- <sup>1</sup> Odvina CV, Zerwekh JE, Rao DS, Maalouf N, Gottschalk FS and Pak CYC. Severely suppressed bone turnover: a potential complication of alendronate therapy. *J Clin Endocrinol Metab* 2005;90:1294-1301.
- <sup>2</sup> Schneider JP. Should bisphosphonates be continued indefinitely? An unusual fracture in a healthy woman on long-term alendronate. *Geriatrics* 2006; 61(1)31-33.
- <sup>3</sup> Cheung R, Leung KK, Lee KC and Chow TC. Sequential non-traumatic femoral shaft fractures in a patient on long-term alendronate. *Hong Kong Med J* 2007;13(6):485-9.
- <sup>4</sup> Lee P, van der Wall H, and Seibel MJ. Looking beyond low bone mineral density: multiple insufficiency fractures in a woman with post-menopausal osteoporosis on alendronate therapy. *J Endocrinol Invest* 2007;30:590-97.
- <sup>5</sup> Goh SK, Yang KY, Koh JSB, Wong MK, Chua SY, Chua DTC and Howe TS. Subtrochanteric insufficiency fractures in patients on alendronate therapy. A caution. *J Bone Joint Surg (Br)* 2007;89-B:349-53.
- <sup>6</sup> Sayed-Noor AS and Sjöden GO. Subtrochanteric displaced insufficiency fracture after long-term alendronate therapy – a case report. *Acta Orthopædica* 2008;79(4):565-567
- <sup>7</sup> Visekruna M, Wilson D, and McKiernan FE. Severely suppressed bone turnover and atypical skeletal fragility. *J Clin Endocrinol Metabol* 2008;93(8):2948-2952.
- <sup>8</sup> Kwek EBK, Koh JSB and Howe TS. More on atypical fractures of the femoral diaphysis (letter). *N Engl J Med* 2008;359(3):316-318.
- <sup>9</sup> Lenart BA, Lorich DG, and Lane JM. Atypical fractures of the femoral diaphysis in postmenopausal women taking alendronate (letter). *N Engl J Med* 2008;358(12):1304-1306.
- <sup>10</sup> Kwek EBK, Goh SK, Koh JSB Png MA and Howe TS. An emerging pattern of subtrochanteric stress fractures: a long-term complication of alendronate therapy? *Injury* 2008;39:224-31.
- <sup>11</sup> Neviasser AS, Lane JM, Lenart BA, Edobor-Osula F, and Lorich DG. Low-energy femoral shaft fractures associated with alendronate use. *J Orthop Trauma* 2008;22(5):346-350.
- <sup>12</sup> Lenart BA, Neviasser AS, Lyman S, Chang CC, Edobor-Osula F, Steele B et al. Association of low-energy femoral fractures with prolonged bisphosphonate use: a case control study. *Osteoporos Int* 2009;20:1353-1362.
- <sup>13</sup> Sabed-Noor AS, and Sjöden GO. Two femoral insufficiency fractures after long-term alendronate therapy. *Clin Orthop Relat Res* 2009;467:1921-6.
- <sup>14</sup> Ing-Lorenzini K, Desmeules J, Plachta O, Suva D, Dayer P, and Peter R. Low-energy femoral fractures associated with the long-term use of bisphosphonates. A case series from a Swiss University Hospital. *Drug Safety* 2009;32(9):775-785.
- <sup>15</sup> Goddard MS, Kristoff RR, Johnston JC, and Khanuja HS. A traumatic bilateral femur fracture in long-term bisphosphonate use. *Orthopedics* 2009;32:607.
- <sup>16</sup> Odvina CV, Levy S, Rao S, Zerwekh JE, and Rao S. Unusual mid-shaft fractures during long term bisphosphonate therapy. *Clin Endocrinol (Oxf)*, doi: 10.1111/j.1365-2265.2009.03581.x
- <sup>17</sup> Capeci CM and Tejawani NC. Bilateral low-energy simultaneous or sequential femoral fractures in patients on long-term alendronate therapy. *J Bone Joint Surg Am* 2009;91:2556-61
- <sup>18</sup> Giusti A, Hamdy NA, Dekkers OM, Ramautar SR, Dijkstra S, Papapoulos SE. Atypical fractures and bisphosphonate therapy: a cohort study of patients with femoral fracture with radiographic adjudication of fracture site and features. *Bone*. 2011;48(5):966-71.
- <sup>19</sup> Schilcher J, Michaëlsson K, Aspenberg P. Bisphosphonate use and atypical fractures of the femoral shaft. *N Engl J Med*. 2011;364(18):1728-37.
- <sup>20</sup> Park-Wyllie LY, Mamdani MM, Juurlink DN, Hawker GA, Gunraj N, Austin PC, et al. Bisphosphonate use and the risk of subtrochanteric or femoral shaft fractures in older women. *JAMA* 2011;305(8):783-9.
- <sup>21</sup> Salvador Rosa J.C, Moreno Pérez D, Sonogo García Rodríguez LA, de Abajo Iglesias FJ. El Proyecto BIFAP: Base de datos para la Investigación. *Aten Primaria* 2002; 30: 655-661.
- <sup>22</sup> Agencia Española de Medicamentos y Productos Sanitarios. Proyecto BIFAP <http://www.bifap.org/summary.php>
- <sup>23</sup> Meier RPH, Perneger TV, Stern R, Rizzoli R, Peter RE. Increasing occurrence of atypical femoral fractures associated with bisphosphonate use. *Arch Intern Med* 2012;172(12):930-936.

1  
2  
3  
4  
5  
6  
7  
8  
9  
10  
11  
12  
13  
14  
15  
16  
17  
18  
19  
20  
21  
22  
23  
24  
25  
26  
27  
28  
29  
30  
31  
32  
33  
34  
35  
36  
37  
38  
39  
40  
41  
42  
43  
44  
45  
46  
47  
48  
49  
50  
51  
52  
53  
54  
55  
56  
57  
58  
59  
60

<sup>24</sup> Dell RM, Adams AL, Greene DF, Funahashi TT, Silverman SL, Eisemon EO, et al Incidence of Atypical Nontraumatic Diaphyseal Fractures of the Femur. *JBMR* 2012;27(12):2544-2550.

<sup>25</sup> Lenart BA, Neviasser AS, Lyman S, Chang CC, Edobor-Osula F, Steele B et al. Association of low-energy femoral fractures with prolonged bisphosphonate use: a case control study. *Osteoporos Int* 2009; 20:1353-1362.

<sup>26</sup> Koh JSB, Goh SK, Png MA, Ng ACM, Howe TS. Distribution of atypical fractures and cortical stress lesions in the femur: implications on pathophysiology. *Singapore Med J* 2011;52(2):77-80

**STROBE 2007 (v4) checklist of items to be included in reports of observational studies in epidemiology\***  
**Checklist for cohort, case-control, and cross-sectional studies (combined)**

| Section/Topic             | Item # | Recommendation                                                                                                                                                                                                                                                                                                                                                                                                                                                                   | Reported on page # |
|---------------------------|--------|----------------------------------------------------------------------------------------------------------------------------------------------------------------------------------------------------------------------------------------------------------------------------------------------------------------------------------------------------------------------------------------------------------------------------------------------------------------------------------|--------------------|
| Title and abstract        | 1      | (a) Indicate the study’s design with a commonly used term in the title or the abstract. <b>OK</b>                                                                                                                                                                                                                                                                                                                                                                                |                    |
|                           |        | (b) Provide in the abstract an informative and balanced summary of what was done and what was found <b>OK</b>                                                                                                                                                                                                                                                                                                                                                                    |                    |
| <b>Introduction</b>       |        |                                                                                                                                                                                                                                                                                                                                                                                                                                                                                  |                    |
| Background/rationale      | 2      | Explain the scientific background and rationale for the investigation being reported <b>OK</b>                                                                                                                                                                                                                                                                                                                                                                                   |                    |
| Objectives                | 3      | State specific objectives, including any pre-specified hypotheses <b>OK</b>                                                                                                                                                                                                                                                                                                                                                                                                      |                    |
| <b>Methods</b>            |        |                                                                                                                                                                                                                                                                                                                                                                                                                                                                                  |                    |
| Study design              | 4      | Present key elements of study design early in the paper <b>OK</b>                                                                                                                                                                                                                                                                                                                                                                                                                |                    |
| Setting                   | 5      | Describe the setting, locations, and relevant dates, including periods of recruitment, exposure, follow-up, and data collection <b>OK</b>                                                                                                                                                                                                                                                                                                                                        |                    |
| Participants              | 6      | (a) <i>Cohort study</i> —Give the eligibility criteria, and the sources and methods of selection of participants. Describe methods of follow-up<br><i>Case-control study</i> —Give the eligibility criteria, and the sources and methods of case ascertainment and control selection. Give the rationale for the choice of cases and controls <b>OK</b><br><i>Cross-sectional study</i> —Give the eligibility criteria, and the sources and methods of selection of participants |                    |
|                           |        | (b) <i>Cohort study</i> —For matched studies, give matching criteria and number of exposed and unexposed<br><i>Case-control study</i> —For matched studies, give matching criteria and the number of controls per case <b>OK</b>                                                                                                                                                                                                                                                 |                    |
| Variables                 | 7      | Clearly define all outcomes, exposures, predictors, potential confounders, and effect modifiers. Give diagnostic criteria, if applicable <b>OK</b>                                                                                                                                                                                                                                                                                                                               |                    |
| Data sources/ measurement | 8*     | For each variable of interest, give sources of data and details of methods of assessment (measurement). Describe comparability of assessment methods if there is more than one group <b>OK</b>                                                                                                                                                                                                                                                                                   |                    |
| Bias                      | 9      | Describe any efforts to address potential sources of bias <b>OK</b>                                                                                                                                                                                                                                                                                                                                                                                                              |                    |
| Study size                | 10     | Explain how the study size was arrived at <b>OK</b>                                                                                                                                                                                                                                                                                                                                                                                                                              |                    |
| Quantitative variables    | 11     | Explain how quantitative variables were handled in the analyses. If applicable, describe which groupings were chosen and why <b>OK</b>                                                                                                                                                                                                                                                                                                                                           |                    |
| Statistical methods       | 12     | (a) Describe all statistical methods, including those used to control for confounding <b>OK</b>                                                                                                                                                                                                                                                                                                                                                                                  |                    |
|                           |        | (b) Describe any methods used to examine subgroups and interactions <b>OK</b>                                                                                                                                                                                                                                                                                                                                                                                                    |                    |
|                           |        | (c) Explain how missing data were addressed <b>OK</b>                                                                                                                                                                                                                                                                                                                                                                                                                            |                    |
|                           |        | (d) <i>Cohort study</i> —If applicable, explain how loss to follow-up was addressed<br><i>Case-control study</i> —If applicable, explain how matching of cases and controls was addressed <b>OK</b>                                                                                                                                                                                                                                                                              |                    |



|                          |     |                                                                                                                                                                                                                        |  |
|--------------------------|-----|------------------------------------------------------------------------------------------------------------------------------------------------------------------------------------------------------------------------|--|
|                          |     | <i>Cross-sectional study</i> —If applicable, describe analytical methods taking account of sampling strategy                                                                                                           |  |
|                          |     | (e) Describe any sensitivity analyses                                                                                                                                                                                  |  |
| <b>Results</b>           |     |                                                                                                                                                                                                                        |  |
| Participants             | 13* | (a) Report numbers of individuals at each stage of study—eg numbers potentially eligible, examined for eligibility, confirmed eligible, included in the study, completing follow-up, and analysed <b>OK</b>            |  |
|                          |     | (b) Give reasons for non-participation at each stage <b>Not applicable</b>                                                                                                                                             |  |
|                          |     | (c) Consider use of a flow diagram <b>Not applicable</b>                                                                                                                                                               |  |
| Descriptive data         | 14* | (a) Give characteristics of study participants (eg demographic, clinical, social) and information on exposures and potential confounders <b>OK</b>                                                                     |  |
|                          |     | (b) Indicate number of participants with missing data for each variable of interest <b>OK</b>                                                                                                                          |  |
|                          |     | (c) <i>Cohort study</i> —Summarise follow-up time (eg, average and total amount)                                                                                                                                       |  |
| Outcome data             | 15* | <i>Cohort study</i> —Report numbers of outcome events or summary measures over time                                                                                                                                    |  |
|                          |     | <i>Case-control study</i> —Report numbers in each exposure category, or summary measures of exposure <b>OK</b>                                                                                                         |  |
|                          |     | <i>Cross-sectional study</i> —Report numbers of outcome events or summary measures                                                                                                                                     |  |
| Main results             | 16  | (a) Give unadjusted estimates and, if applicable, confounder-adjusted estimates and their precision (eg, 95% confidence interval). Make clear which confounders were adjusted for and why they were included <b>OK</b> |  |
|                          |     | (b) Report category boundaries when continuous variables were categorized <b>OK</b>                                                                                                                                    |  |
|                          |     | (c) If relevant, consider translating estimates of relative risk into absolute risk for a meaningful time period                                                                                                       |  |
| Other analyses           | 17  | Report other analyses done—eg analyses of subgroups and interactions, and sensitivity analyses <b>OK</b>                                                                                                               |  |
| <b>Discussion</b>        |     |                                                                                                                                                                                                                        |  |
| Key results              | 18  | Summarise key results with reference to study objectives <b>OK</b>                                                                                                                                                     |  |
| Limitations              | 19  | Discuss limitations of the study, taking into account sources of potential bias or imprecision. Discuss both direction and magnitude of any potential bias <b>OK</b>                                                   |  |
| Interpretation           | 20  | Give a cautious overall interpretation of results considering objectives, limitations, multiplicity of analyses, results from similar studies, and other relevant evidence <b>OK</b>                                   |  |
| Generalisability         | 21  | Discuss the generalisability (external validity) of the study results <b>OK</b>                                                                                                                                        |  |
| <b>Other information</b> |     |                                                                                                                                                                                                                        |  |
| Funding                  | 22  | Give the source of funding and the role of the funders for the present study and, if applicable, for the original study on which the present article is based <b>OK</b>                                                |  |

\*Give information separately for cases and controls in case-control studies and, if applicable, for exposed and unexposed groups in cohort and cross-sectional studies.

**Note:** An Explanation and Elaboration article discusses each checklist item and gives methodological background and published examples of transparent reporting. The STROBE checklist is best used in conjunction with this article (freely available on the Web sites of PLoS Medicine at <http://www.plosmedicine.org/>, Annals of Internal Medicine at <http://www.annals.org/>, and Epidemiology at <http://www.epidem.com/>). Information on the STROBE Initiative is available at [www.strobe-statement.org](http://www.strobe-statement.org).
